# Supplementary material for: Efficient methylation of anilines with methanol catalysed by cyclometalated ruthenium complexes
Source: Royal Society of Chemistry journal article supplement (doi:10.1039/d0cy02210a), 2021-01-01

# Electronic Supplementary Information

## Efficient Methylation of Anilines with Methanol Catalysed by Cyclometalated Ruthenium Complexes

Patrick Piehl<sup>a</sup>, Roberta Amuso<sup>a,b</sup>, Anke Spannenberg<sup>a</sup>, Bartolo Gabriele<sup>b</sup>, Helfried  
Neumann<sup>a</sup> and Matthias Beller\*<sup>a</sup>

<sup>a</sup> *Leibniz-Institut für Katalyse e.V.*  
*Albert-Einstein-Straße 29a, 18059 Rostock, Germany*  
*E-Mail: Matthias.Beller@catalysis.de*

<sup>b</sup> *Laboratory of Industrial and Synthetic Organic Chemistry (LISOC), Department of Chemistry and Chemical  
Technologies, University of Calabria, Via Pietro Bucci 12/C, 87036 Arcavacata di Rende (CS), Italy*

## Table of Contents

|                                                                                                                                                 |    |
|-------------------------------------------------------------------------------------------------------------------------------------------------|----|
| General Information .....                                                                                                                       | 3  |
| General procedure for the synthesis of cyclometalated ruthenium complexes $[\text{Ru}(\text{C}^{\wedge}\text{N})(\text{p-cym})\text{Cl}]$ ..... | 3  |
| Optimisation of the Ruthenium-catalysed <i>N</i> -Methylation of Anilines .....                                                                 | 6  |
| Control Experiments for the Ruthenium-catalysed <i>N</i> -Methylation of Anilines.....                                                          | 7  |
| Experiments to Determine the Deuteration Ratio of <i>N</i> -Methylaniline with Differently Deuterated Methanol .....                            | 7  |
| Yield Time Plot of the Model Reaction .....                                                                                                     | 8  |
| Mechanistic Proposal for a Catalytic Cycle .....                                                                                                | 8  |
| Control Experiments for the Ruthenium-catalysed <i>N</i> -Methylation of Anilines.....                                                          | 9  |
| General Procedure for the Ruthenium-catalysed <i>N</i> -Methylation of Anilines .....                                                           | 9  |
| NMR and IR Spectra.....                                                                                                                         | 13 |

## General Information

Unless otherwise stated, reactions were carried out under an argon atmosphere with exclusion of air and moisture by standard techniques for the manipulation air sensitive compounds. Reaction temperatures refer to external bath temperatures. TLC was performed on silica gel 60 F254 (layer thickness 0.2 mm) and spots were located using UV light and/or by treating the plates with phosphomolybdic acid reagent followed by heating. Column chromatography was performed on silica gel (230–400 mesh) using ethyl acetate/heptane as eluent. NMR spectra were performed on a Bruker Avance 400 spectrometer using the residual solvent signal as internal standard [chloroform: 7.26 ppm (1H), 77.0 ppm (13C)]. All measurements were carried out at room temperature unless otherwise stated. Mass spectra were in general recorded on a MAT 95XP or a HP 5973N mass selective detector. Gas chromatography was performed on a HP 6890N chromatographer with a HP5 column. Commercial reagents were used as received without purification.

## General procedure for the synthesis of cyclometalated ruthenium complexes [Ru(C^N)(p-cym)Cl]

According to literature procedures,<sup>[1]</sup> [Ru(*p*-cym)Cl<sub>2</sub>]<sub>2</sub> (1.0 mmol), the aryl-substituted heterocycle (2.0 mmol) and KOAc (4.0 mmol) were dissolved in 50 ml of methanol and the resulting suspension stirred at room temperature for 4 days. Evaporation of the solvent provided the crude product as an orange solid which was purified either by column chromatography or washing with a suitable solvent mixture to remove impurities.

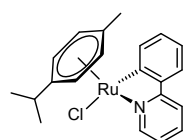

**[Ru(2-phenyl pyridine)(*p*-cym)Cl], 4:**<sup>[1]</sup> Following the general procedure, the reaction of [Ru(*p*-cym)Cl<sub>2</sub>]<sub>2</sub> with 2-phenyl pyridine provided [Ru(2-phenyl pyridine)(*p*-cym)Cl] as an orange solid. The crude product was washed with a solution of heptane/ethyl acetate (1:1, 3 x 10 ml). The remaining solid was then dissolved in CH<sub>2</sub>Cl<sub>2</sub> and the resulting solution filtered to remove insoluble impurities. After evaporation of the solvent, the pure product was obtained as an orange solid (742.4 mg, 87%).

<sup>1</sup>H NMR (400 MHz, CDCl<sub>3</sub>) δ = 0.88 (d, *J* = 6.9 Hz, 3H), 0.98 (d, *J* = 6.9 Hz, 3H), 2.04 (s, 3H), 2.43 (hept, *J* = 6.9 Hz, 1H), 4.98 (dd, *J* = 5.9, 1.3 Hz, 1H), 5.17 (dd, *J* = 5.9, 1.2 Hz, 1H), 5.57 (ddd, *J* = 10.4, 6.0, 1.2 Hz, 2H), 6.98 – 7.08 (m, 2H), 7.17 (td, *J* = 7.4, 1.4 Hz, 1H), 7.57 – 7.74 (m, 3H), 8.15 (ddd, *J* = 7.5, 1.2, 0.5 Hz, 1H), 9.23 (ddd, *J* = 5.7, 1.6, 0.8 Hz, 1H) ppm.

<sup>13</sup>C NMR (101 MHz, CDCl<sub>3</sub>) δ = 18.9 (CH<sub>3</sub>), 21.9 (CH<sub>3</sub>), 22.7 (CH<sub>3</sub>), 30.9 (CH), 82.3 (CH), 84.2 (CH), 89.8 (CH), 90.9 (CH), 100.6 (C), 100.8 (C), 118.9 (CH), 121.5 (CH), 122.6 (CH), 124.0 (CH), 129.6 (CH), 136.7 (CH), 139.7 (CH), 143.4 (C), 154.7 (CH), 165.5 (C), 181.5 (Ru-C) ppm.

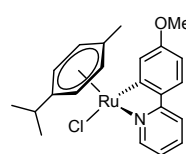

**[Ru(2-(4-methoxy phenyl) pyridine)(*p*-cym)Cl], 5:** Following the general procedure, the reaction of [Ru(*p*-cym)Cl<sub>2</sub>]<sub>2</sub> with 2-(4-methoxy phenyl) pyridine provided [Ru(2-(4-methoxy phenyl) pyridine)(*p*-cym)Cl] as an orange solid. The crude product was washed with MeOH (3 x 5 ml). The remaining solid was then dissolved in CH<sub>2</sub>Cl<sub>2</sub> and the resulting

[1] B. Li, T. Roisnel, C. Darcel, P. H. Dixneuf, *Dalton Trans.* **2012**, 41, 10934-10937.

solution filtered to remove insoluble impurities. After evaporation of the solvent, the pure product was obtained as an orange solid (612.1 mg, 67%).

**<sup>1</sup>H NMR** (300 MHz, CDCl<sub>3</sub>) δ = 0.88 (d, *J*=6.9, 3H), 0.98 (d, *J*=6.9, 3H), 2.04 (s, 3H), 2.44 (hept, *J*=7.0, 1H), 3.90 (s, 3H), 4.97 (dd, *J*=6.0, 1.2, 1H), 5.17 (dd, *J*=6.0, 1.2, 1H), 5.50 – 5.59 (m, 2H), 6.58 (dd, *J*=8.5, 2.5, 1H), 6.95 (ddd, *J*=6.2, 5.7, 2.3, 1H), 7.52 – 7.63 (m, 3H), 7.70 (d, *J*=2.5, 1H), 9.10 – 9.19 (m, 1H) ppm;

**<sup>13</sup>C NMR** (75 MHz, CDCl<sub>3</sub>) δ = 18.9 (CH<sub>3</sub>), 21.8 (CH<sub>3</sub>), 22.7 (CH<sub>3</sub>), 30.9 (CH), 55.3 (CH<sub>3</sub>), 82.4 (CH), 84.4 (CH), 89.6 (CH), 90.6 (CH), 100.4 (C), 100.6 (C), 108.8 (CH), 118.2 (CH), 120.4 (CH), 124.0 (CH), 125.0 (CH), 136.5 (CH), 136.7 (C), 154.5 (CH), 159.7 (C), 165.0 (C), 183.4 (C-Ru) ppm.

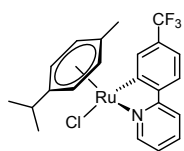

**[Ru(2-(4-trifluoromethyl phenyl) pyridine)(*p*-cym)Cl], 6:** Following the general procedure, the reaction of [Ru(*p*-cym)Cl<sub>2</sub>]<sub>2</sub> with 2-(4-trifluoromethyl phenyl) pyridine provided [Ru(2-(4-trifluoromethyl phenyl) pyridine)(*p*-cym)Cl] as an orange solid. The crude product was washed with MeOH (3 x 5 ml). The remaining solid was then dissolved

in CH<sub>2</sub>Cl<sub>2</sub> and the resulting solution filtered to remove insoluble impurities. After evaporation of the solvent, the pure product was obtained as an orange solid (731.2 mg, 74%).

**<sup>1</sup>H NMR** (300 MHz, CDCl<sub>3</sub>) δ = 0.86 (d, *J*=6.9, 3H), 0.97 (d, *J*=6.9, 3H), 2.06 (s, 3H), 2.41 (hept, *J*=6.9, 1H), 5.01 (dd, *J*=6.0, 1.2, 1H), 5.20 (dd, *J*=6.0, 1.1, 1H), 5.56 – 5.63 (m, 2H), 7.12 (ddd, *J*=7.3, 5.7, 1.7, 1H), 7.24 (ddd, *J*=8.1, 1.8, 0.7, 1H), 7.62 – 7.72 (m, 2H), 7.75 (ddd, *J*=8.3, 1.7, 0.8, 1H), 8.38 (dd, *J*=1.8, 0.9, 1H), 9.25 (ddd, *J*=5.7, 1.5, 0.8, 1H) ppm;

**<sup>13</sup>C NMR** (75 MHz, CDCl<sub>3</sub>) δ = 18.9 (CH), 21.8 (CH<sub>3</sub>), 22.6 (CH<sub>3</sub>), 31.0 (CH), 82.2 (CH), 84.6 (CH), 89.9 (CH), 91.1 (CH), 101.4 (C), 101.7 (C), 119.6 (q, *J*=4.0, CH), 119.7 (CH), 122.6 (CH), 123.5 (CH), 130.0 (q, *J*=30.3, CCF<sub>3</sub>), 135.6 (q, *J*=3.5, CH), 137.1 (CH), 146.7 (q, *J*=1.6, C), 154.9 (CH), 164.1 (C), 181.4 (Ru-C) ppm, CF<sub>3</sub> not detectable;

**<sup>19</sup>F NMR** (282 MHz, CDCl<sub>3</sub>) δ = -62.0 ppm.

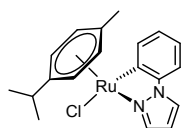

**[Ru(1-phenyl pyrazole)(*p*-cym)Cl], 7:**<sup>[1]</sup> Following the general procedure, the reaction of [Ru(*p*-cym)Cl<sub>2</sub>]<sub>2</sub> with 1-phenyl pyrazole provided [Ru(1-phenyl pyrazole)(*p*-cym)Cl] as a yellowish orange solid. The crude product was washed with a solution of heptane/ethyl acetate (1:1, 3 x 10 ml). The remaining solid was then dissolved in CH<sub>2</sub>Cl<sub>2</sub> and the resulting

solution filtered to remove insoluble impurities. After evaporation of the solvent, the pure product was obtained as a yellowish orange solid (556.6 mg, 67%).

**<sup>1</sup>H NMR** (400 MHz, CDCl<sub>3</sub>) δ = 0.94 (dd, *J*=14.2, 6.9, 6H), 2.04 (s, 3H), 2.43 (hept, *J*=6.9, 1H), 5.05 – 5.10 (m, 1H), 5.26 – 5.30 (m, 1H), 5.55 (dd, *J*=5.8, 1.2, 2H), 6.46 (dd, *J*=2.8, 2.2, 1H), 6.99 – 7.05 (m, 1H), 7.10 (td, *J*=7.3, 1.4, 1H), 7.16 (dd, *J*=7.7, 1.3, 1H), 7.90 (dd, *J*=2.8, 0.7, 1H), 8.05 (dd, *J*=2.2, 0.7, 1H), 8.13 (dd, *J*=7.3, 1.3, 1H) ppm;

**<sup>13</sup>C NMR** (101 MHz, CDCl<sub>3</sub>) δ = 18.9 (CH<sub>3</sub>), 22.0 (CH<sub>3</sub>), 22.5 (CH<sub>3</sub>), 30.8 (CH), 82.3 (CH), 84.2 (CH), 88.2 (CH), 88.7 (CH), 100.1 (C), 100.1 (C), 108.4 (CH), 111.5 (CH), 123.2 (CH), 125.0 (CH), 126.1 (CH), 140.2 (CH), 141.9 (C), 142.2 (CH), 161.9 (Ru-C) ppm.

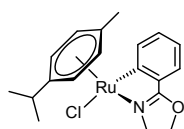

**[Ru(2-phenyl-2-oxazoline)(*p*-cym)Cl], 8:**<sup>[1]</sup> Following the general procedure, the reaction of [Ru(*p*-cym)Cl<sub>2</sub>]<sub>2</sub> with 2-phenyl-2-oxazoline provided [Ru(2-phenyl-2-oxazoline)(*p*-cym)Cl] as an orange solid. The crude product was purified by column chromatography under an argon atmosphere using heptane/ethyl acetate (1:1) with 1% NEt<sub>3</sub> as eluent

(412.2 mg, 49%).

**<sup>1</sup>H NMR** (400 MHz, CDCl<sub>3</sub>) δ = 0.97 (d, *J*=6.8, 3H), 1.08 (d, *J*=6.9, 3H), 2.03 (s, 3H), 2.53 (hept, *J*=6.9, 1H), 4.02 – 4.24 (m, 2H), 4.58 – 4.78 (m, 2H), 4.96 (dd, *J*=5.8, 1.2, 1H), 5.17 (dd, *J*=5.9, 1.2, 1H), 5.43 (dd, *J*=5.9,

1.2, 1H), 5.53 (dd,  $J=5.8, 1.2, 1\text{H}$ ), 6.96 (td,  $J=7.4, 1.1, 1\text{H}$ ), 7.19 (td,  $J=7.4, 1.5, 1\text{H}$ ), 7.33 (ddd,  $J=7.5, 1.5, 0.6, 1\text{H}$ ), 8.13 (ddd,  $J=7.6, 1.1, 0.5, 1\text{H}$ ) ppm;

$^{13}\text{C NMR}$  (101 MHz,  $\text{CDCl}_3$ )  $\delta = 19.0$  ( $\text{CH}_3$ ), 22.1 ( $\text{CH}_3$ ), 22.7 ( $\text{CH}_3$ ), 31.1 (CH), 54.4 ( $\text{CH}_2$ ), 70.7 ( $\text{CH}_2$ ), 80.9 (CH), 81.7 (CH), 87.5 (CH), 88.0 (CH), 99.2 (C), 101.3 (C), 122.3 (CH), 126.4 (CH), 130.6 (CH), 130.8 (C), 139.3 (CH), 174.2 (CH), 182.7 (CH) ppm.

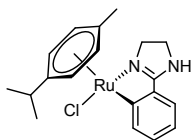

**[Ru(2-phenyl imidazoline)(p-cym)Cl], 9:** Following the general procedure, the reaction of  $[\text{Ru}(\text{p-cym})\text{Cl}_2]_2$  with 2-phenyl imidazoline provided  $[\text{Ru}(\text{2-phenyl imidazoline})(\text{p-cym})\text{Cl}]$  as an orange solid. The crude product was washed with MeOH (3 x 5 ml). The remaining solid was then dissolved in  $\text{CH}_2\text{Cl}_2$  and the resulting solution filtered to remove insoluble impurities. After evaporation of the solvent, the product was obtained as an orange solid (300.3 mg, 72%). Crystals suitable for x-ray crystal structure analysis were obtained by slow evaporation of a solution of **9** in THF.

$^1\text{H NMR}$  (300 MHz,  $\text{CDCl}_3$ )  $\delta = 0.95$  (dd,  $J=18.4, 6.9, 6\text{H}$ ), 2.00 (s, 3H), 2.29 – 2.47 (m, 2H), 3.26 (dt,  $J=10.9, 9.0, 1\text{H}$ ), 3.76 – 3.98 (m, 2H), 4.91 (dd,  $J=5.7, 1.2, 1\text{H}$ ), 5.14 (dd,  $J=5.9, 1.2, 1\text{H}$ ), 5.37 (dd,  $J=5.8, 1.2, 1\text{H}$ ), 5.43 (dd,  $J=5.7, 1.2, 1\text{H}$ ), 6.19 (d,  $J=2.9, 1\text{H}$ ), 6.93 (td,  $J=7.4, 1.2, 1\text{H}$ ), 7.12 (td,  $J=7.4, 1.5, 1\text{H}$ ), 7.32 (ddd,  $J=7.4, 1.5, 0.5, 1\text{H}$ ), 8.16 (ddd,  $J=7.5, 1.2, 0.5, 1\text{H}$ ) ppm;

$^{13}\text{C NMR}$  (75 MHz,  $\text{CDCl}_3$ )  $\delta = 19.0$  ( $\text{CH}_3$ ), 22.3 ( $\text{CH}_3$ ), 22.6 ( $\text{CH}_3$ ), 31.1 (CH), 44.3 ( $\text{CH}_2$ ), 56.0 ( $\text{CH}_2$ ), 80.6 (CH), 82.5 (CH), 87.3 (CH), 87.9 (CH), 99.1 (C), 99.3 (C), 121.7 (CH), 125.4 (CH), 129.4 (CH), 135.1 (C), 139.4 (CH), 172.3 (C), 182.6 (C-Ru) ppm;

**Elemental Anal.** calcd. for  $\text{C}_{19}\text{H}_{23}\text{ClN}_2\text{Ru}$ : C, 54.87; H, 5.57; Cl, 8.52; N, 6.74; Ru, 24.30; found: C, 44.6; H, 4.4; Cl, 15.5; N, 5.2; Ru, 20.1. According to this, the sample contains ca. 82% of compound **9** and 18% of KCl.

**HRMS** (ESI-TOF):  $m/z$ : calcd for  $[\text{M}-\text{Cl}]^+$ : 381.0905, found 381.0901.

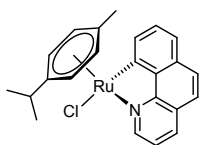

**[Ru(benzo[h]quinone)(p-cym)Cl], 10:**<sup>[1]</sup> Following the general procedure, the reaction of  $[\text{Ru}(\text{p-cym})\text{Cl}_2]_2$  with benzo[h]quinone provided  $[\text{Ru}(\text{benzo}[h]\text{quinone})(\text{p-cym})\text{Cl}]$  as a dark green solid. The crude product was purified by column chromatography under an argon atmosphere using heptane/ethyl acetate (1:1) with 1%  $\text{NEt}_3$  as eluent (738.9 mg, 82%).

$^1\text{H NMR}$  (400 MHz,  $\text{CD}_2\text{Cl}_2$ )  $\delta = 0.80$  (d,  $J=6.9, 3\text{H}$ ), 0.93 (d,  $J=6.9, 3\text{H}$ ), 2.00 (s, 3H), 2.44 (hept,  $J=6.9, 1\text{H}$ ), 5.12 (dd,  $J=5.9, 1.2, 1\text{H}$ ), 5.30 (dd,  $J=5.9, 1.2, 1\text{H}$ ), 5.67 (dd,  $J=5.9, 1.2, 1\text{H}$ ), 5.73 (dd,  $J=5.9, 1.3, 1\text{H}$ ), 7.47 (dd,  $J=8.0, 5.3, 1\text{H}$ ), 7.53 – 7.62 (m, 3H), 7.79 (d,  $J=8.7, 1\text{H}$ ), 8.21 (dd,  $J=8.0, 1.3, 1\text{H}$ ), 8.38 (dd,  $J=6.4, 1.7, 1\text{H}$ ), 9.47 (dd,  $J=5.3, 1.3, 1\text{H}$ ) ppm;

$^{13}\text{C NMR}$  (101 MHz,  $\text{CD}_2\text{Cl}_2$ )  $\delta = 19.0$  ( $\text{CH}_3$ ), 21.9 ( $\text{CH}_3$ ), 22.7 ( $\text{CH}_3$ ), 31.3 (CH), 82.6 (CH), 84.0 (CH), 89.7 (CH), 90.3 (CH), 100.3 (C), 101.6 (C), 120.9 (CH), 121.6 (CH), 123.3 (CH), 127.1 (C), 129.3 (CH), 129.7 (CH), 134.1 (C), 135.9 (CH), 136.9 (CH), 140.9 (C), 153.2 (CH), 155.5 (C), 179.3 (Ru-C) ppm.

## Optimisation of the Ruthenium-catalysed *N*-Methylation of Anilines

In a glass pressure tube (25 mL) under an argon atmosphere, ruthenium complex, base, and aniline (91  $\mu$ l, 1.0 mmol) were dissolved in methanol. Next, the pressure tube was closed, and the resulting mixture was stirred at the stated temperature in an aluminium block for 22 hours. After cooling down to room temperature, the mixture was quenched with ethyl acetate, 100  $\mu$ l of hexadecane were added, filtrated, and analysed by GC.

**Table S1.** Ruthenium-catalysed *N*-methylation of aniline with methanol: Full variation of reaction conditions.

| #  | catalyst loading | base                            | base loading | temperature [°C] | MeOH [ml]    | yield [%] |
|----|------------------|---------------------------------|--------------|------------------|--------------|-----------|
| 1  | 2 mol%           | KOtBu                           | 100 mol%     | 70               | 1.5          | 98        |
| 2  | 2 mol%           | KOtBu                           | 75 mol%      | 70               | 1.5          | 92        |
| 3  | 2 mol%           | KOtBu                           | 50 mol%      | 70               | 1.5          | 92        |
| 4  | 2 mol%           | KOtBu                           | 25 mol%      | 70               | 1.5          | 92        |
| 5  | 2 mol%           | KOtBu                           | 20 mol%      | 70               | 1.5          | 91        |
| 6  | 2 mol%           | KOtBu                           | 10 mol%      | 70               | 1.5          | 91        |
| 7  | 2 mol%           | KOtBu                           | 5 mol%       | 70               | 1.5          | 85        |
| 8  | 2 mol%           | KOtBu                           | 2 mol%       | 70               | 1.5          | 74        |
| 9  | 2 mol%           | NaOtBu                          | 5 mol%       | 70               | 1.5          | 82        |
| 10 | 2 mol%           | NaOH                            | 5 mol%       | 70               | 1.5          | 81        |
| 11 | 2 mol%           | K <sub>2</sub> CO <sub>3</sub>  | 5 mol%       | 70               | 1.5          | 84        |
| 12 | 2 mol%           | Cs <sub>2</sub> CO <sub>3</sub> | 5 mol%       | 70               | 1.5          | 82        |
| 13 | 2 mol%           | Cs <sub>2</sub> CO <sub>3</sub> | 10 mol%      | 70               | 1.5          | 88        |
| 14 | 2 mol%           | NaOH                            | 10 mol%      | 70               | 1.5          | 87        |
| 15 | 2 mol%           | NaOtBu                          | 10 mol%      | 70               | 1.5          | 87        |
| 16 | 2 mol%           | K <sub>2</sub> CO <sub>3</sub>  | 10 mol%      | 70               | 1.5          | 84        |
| 17 | 2 mol%           | NEt <sub>3</sub>                | 10 mol%      | 70               | 1.5          | -         |
| 18 | 3 mol%           | NaOH                            | 10 mol%      | 70               | 1.5          | 87        |
| 19 | 1 mol%           | NaOH                            | 10 mol%      | 70               | 1.5          | 75        |
| 20 | 2 mol%           | NaOH                            | 10 mol%      | 70               | 0.5          | 88        |
| 21 | 2 mol%           | NaOH                            | 10 mol%      | 70               | 2.0          | 68        |
| 22 | 2 mol%           | NaOH                            | 10 mol%      | 70               | 0.5 (techn.) | 91        |
| 23 | 2 mol%           | NaOH                            | 10 mol%      | 60               | 0.5 (techn.) | 96        |
| 24 | 2 mol%           | NaOH                            | 10 mol%      | 50               | 0.5 (techn.) | 51        |
| 25 | 2 mol%           | NaOH                            | 10 mol%      | 40               | 0.5 (techn.) | 14        |
| 26 | -                | NaOH                            | 10 mol%      | 60               | 0.5 (techn.) | -         |
| 27 | 2 mol%           | -                               | -            | 60               | 0.5 (techn.) | -         |
| 28 | [Ru-5]           | NaOH                            | 10 mol%      | 60               | 0.5 (techn.) | 79        |

## Control Experiments for the Ruthenium-catalysed *N*-Methylation of Anilines

In a glass pressure tube (25 mL) under an argon atmosphere, ruthenium complex **9** (8.3 mg, 0.02 mmol), NaOH (4.0 mg, 0.1 mmol), aniline (91  $\mu$ l, 1.0 mmol), and the stated additive were dissolved in methanol (0.5 mL). Next, the pressure tube was closed, and the resulting mixture was stirred at 60 °C in an aluminium block for 22 hours. After cooling down to room temperature, the mixture was quenched with ethyl acetate, 100  $\mu$ l of hexadecane were added, filtrated, and analysed by GC.

**Table S2.** Control experiments with different additives.

| # | additive            | amount    | yield [%] |
|---|---------------------|-----------|-----------|
| 1 | PPh <sub>3</sub>    | 0.01 mmol | 78        |
| 2 | PPh <sub>3</sub>    | 0.04 mmol | -         |
| 3 | 1,10-phenanthroline | 0.01 mmol | 68        |
| 4 | 1,10-phenanthroline | 0.04 mmol | -         |
| 5 | mercury             | 1 drop    | 98        |
| 6 | phenyl imidazoline  | 0.1 mmol  | 79        |
| 7 | <i>p</i> -cymene    | 0.1 mmol  | 99        |

## Experiments to Determine the Deuteration Ratio of *N*-Methylaniline with Differently Deuterated Methanol

In a glass pressure tube (25 mL) under an argon atmosphere, ruthenium complex **9** (8.3 mg, 0.02 mmol), NaOH (4.0 mg, 0.1 mmol), and aniline (91  $\mu$ l, 1.0 mmol) were dissolved in methanol with the stated deuteration pattern (0.5 mL). Next, the pressure tube was closed, and the resulting mixture was stirred at 60 °C in an aluminium block for 22 hours. After cooling down to room temperature, the mixture was quenched with ethyl acetate, 100  $\mu$ l of hexadecane were added, filtrated, and analysed by GC-MS. Additionally, the crude was purified by flash chromatography on silica gel to afford, after concentration and drying, the corresponding products, which were analysed by <sup>1</sup>H NMR spectroscopy.

**Table S3.** Product deuteration with differently deuterated methanol derivatives.

| # | alcohol | deuteration ratio NH [%] | deuteration ratio Me [%] |
|---|---------|--------------------------|--------------------------|
|---|---------|--------------------------|--------------------------|

|   |             |    |    |
|---|-------------|----|----|
| 1 | methanol-d4 | 35 | 99 |
| 2 | methanol-d3 | 10 | 98 |
| 3 | methanol-OD | 42 | 0  |

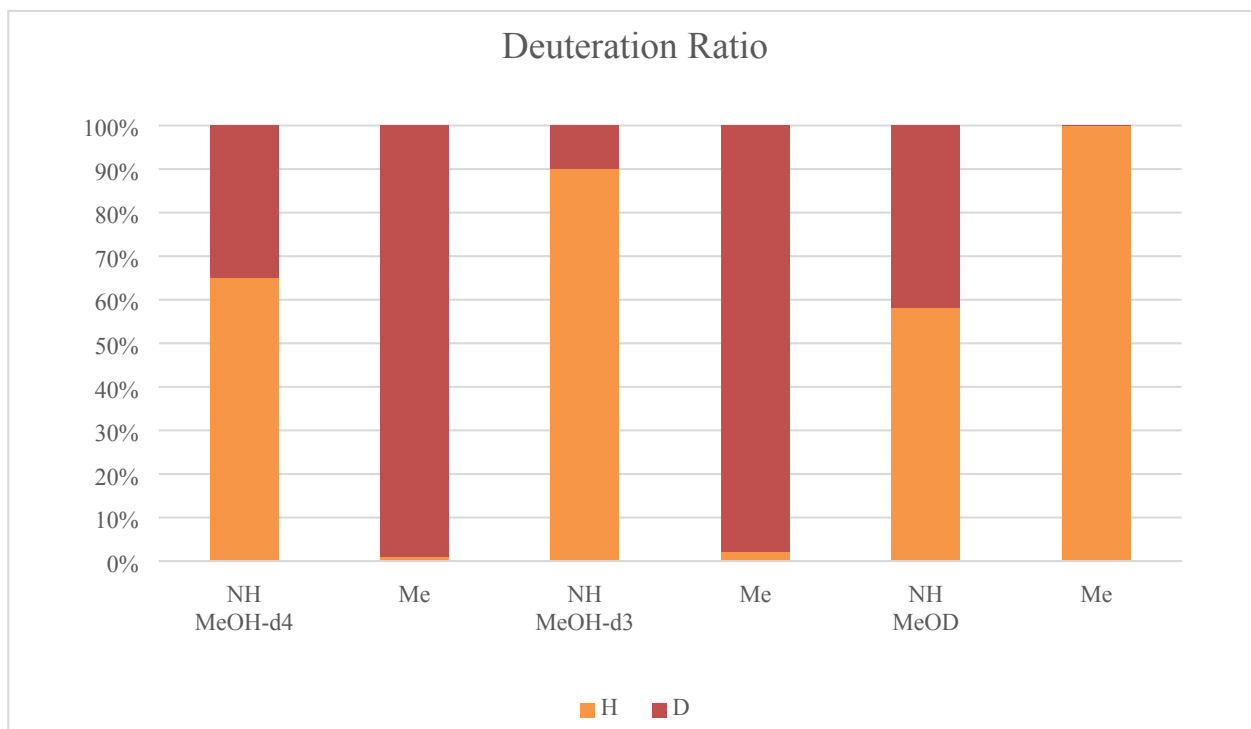

**Figure S1.** Deuteration of different positions in N-methyl aniline when deuterated methanol derivatives are used.



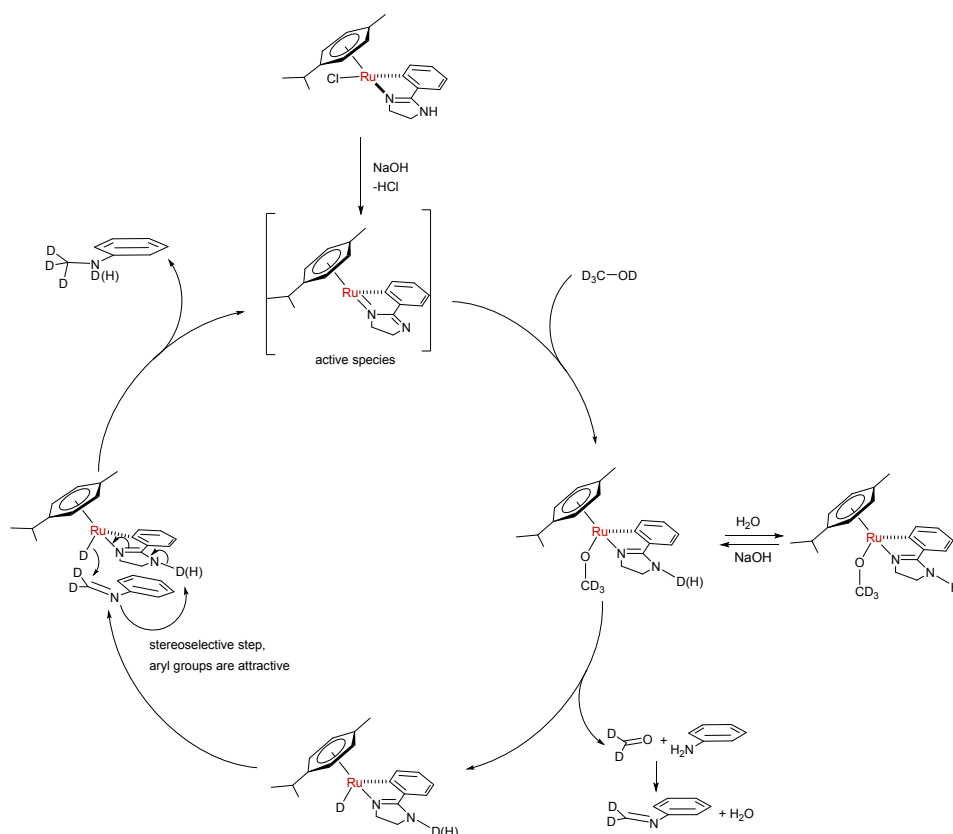

**Scheme S1.** Mechanistic proposal for a catalytic cycle.

## Yield Time Plot of the Model Reaction

In a glass pressure tube (25 mL) under an argon atmosphere, ruthenium complex **9** (8.3 mg, 0.02 mmol), NaOH (4.0 mg, 0.1 mmol), and aniline (91  $\mu$ L, 1.0 mmol) were dissolved in methanol with the stated deuteration pattern (0.5 mL). Next, the pressure tube was closed, and the resulting mixture was stirred at 60 °C in an aluminium block for the stated time hours. After cooling down to room temperature, the mixture was quenched with ethyl acetate, 100  $\mu$ L of hexadecane were added, filtrated, and analysed by GC.

**Table S4.** Ruthenium-catalysed *N*-methylation of aniline with methanol after different times with differently deuterated methanol derivatives.

| #   | Alcohol     | time [h] | yield [%] |
|-----|-------------|----------|-----------|
| 1.1 | methanol    | 1        | 13        |
| 1.2 | methanol    | 3        | 39        |
| 1.3 | methanol    | 5        | 71        |
| 2.1 | methanol-OD | 1        | 16        |
| 2.2 | methanol-OD | 3        | 47        |
| 2.3 | methanol-OD | 5        | 73        |
| 3.1 | methanol-d3 | 1        | 5         |
| 3.2 | methanol-d3 | 3        | 19        |
| 3.3 | methanol-d3 | 5        | 41        |
| 4.1 | methanol-d4 | 1        | 7         |

|     |             |   |    |
|-----|-------------|---|----|
| 4.2 | methanol-d4 | 3 | 22 |
| 4.3 | methanol-d4 | 5 | 45 |

## Control Experiments for the Ruthenium-catalysed *N*-Methylation of Anilines

In a J.-Young-NMR tube, ruthenium complex **9** (8.3 mg, 0.02 mmol) and NaOH (4.0 mg, 0.1 mmol) were suspended in 0.7 mL of MeOH-d4. After the mixture formed a clear orange solution <sup>1</sup>H NMR of it was recorded.

<sup>1</sup>H NMR (400 MHz, MeOD)  $\delta$  = 8.32 – 8.23 (m, 1H), 7.26 (dd,  $J$ =7.5, 1.4, 1H), 7.11 (td,  $J$ =7.4, 1.4, 1H), 6.94 (td,  $J$ =7.4, 1.1, 1H), 5.46 (br. m, 2H), 5.35 – 5.17 (br. m, 1H), 4.92 (br. m, 1H), 4.14 (t,  $J$ =9.8, 2H), 3.82 – 3.72 (m, 2H), 2.22 – 2.12 (m, 1H), 2.08 (s, 3H), 0.82 (s, 6H) ppm.

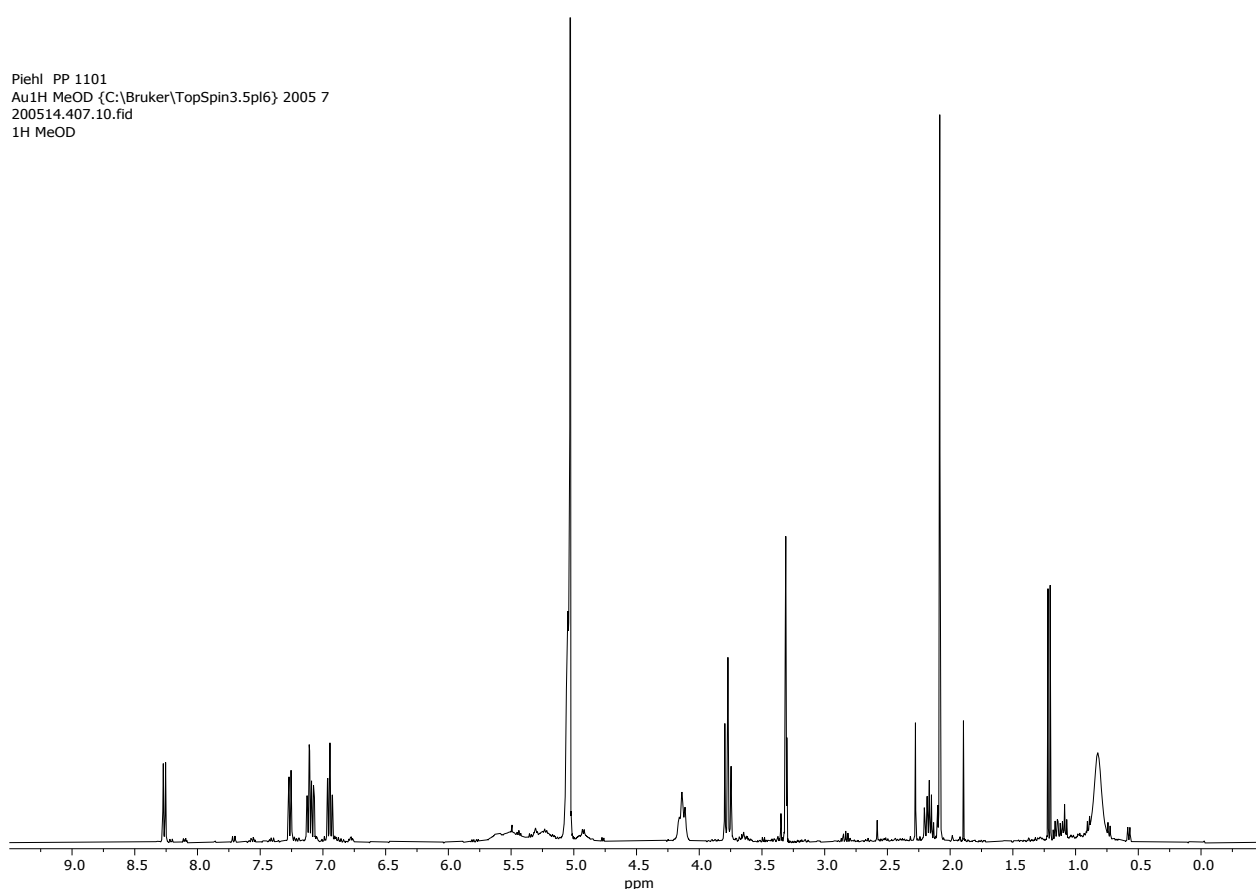

## General Procedure for the Ruthenium-catalysed *N*-Methylation of Anilines

In a glass pressure tube (25 mL) under an argon atmosphere, ruthenium complex **9** (8.3 mg, 0.02 mmol), NaOH (4.0 mg, 0.1 mmol), and the aniline derivative (1.0 mmol) were dissolved the respective alcohol (0.5 mL). Next, the pressure tube was closed, and the resulting mixture was stirred at 60 °C in an aluminium block for 22 hours. After cooling down to room temperature, the crude was directly purified by flash

chromatography on silica gel to afford, after concentration and drying, the corresponding products were obtained in the reported yields.

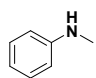

**N-methylaniline (1a):** Following the general procedure, N-methylaniline was obtained as a colourless liquid (102.5 mg, 96%).

$^1\text{H NMR}$  (300 MHz,  $\text{CDCl}_3$ )  $\delta$  = 2.86 (s, 3H), 3.69 (s, 1H), 6.59 – 6.69 (m, 2H), 6.74 (tt,  $J$ =7.5, 1.1, 1H), 7.17 – 7.27 (m, 2H) ppm;  $^{13}\text{C NMR}$  (75 MHz,  $\text{CDCl}_3$ )  $\delta$  = 30.8 (CH<sub>3</sub>), 112.5 (2 x CH), 117.4 (CH), 129.3 (2 x CH), 149.5 (C) ppm; **GCMS** (EI):  $m/z$  (%): 51 (8), 65 (7), 77 (20), 78 (7), 79 (16), 106 (100), 107 (79) [ $\text{M}^+$ ], 108 (7); **HRMS** (ESI-TOF):  $m/z$ : calcd for  $\text{C}_7\text{H}_9\text{N}$ : 108.0813 [ $\text{M}+\text{H}^+$ ]; found: 108.0811.

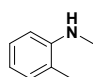

**N,2-dimethylaniline (1b):** Following the general procedure except using 30 mol% NaOH and a reaction temperature of 100 °C, N,2-dimethylaniline was obtained as a colourless liquid (42.8 mg, 35%, determined by GC using hexadecane as internal standard).

$^1\text{H NMR}$  (400 MHz,  $\text{CDCl}_3$ )  $\delta$  = 2.16 (s, 3H), 2.92 (s, 3H), 3.58 (s, 1H), 6.64 (dd,  $J$ =8.1, 1.2, 1H), 6.70 (td,  $J$ =7.4, 1.2, 1H), 7.08 (ddq,  $J$ =7.3, 1.7, 0.8, 1H), 7.19 (dddd,  $J$ =8.0, 7.4, 1.6, 0.6, 1H) ppm;  $^{13}\text{C NMR}$  (101 MHz,  $\text{CDCl}_3$ )  $\delta$  = 17.5 (CH<sub>3</sub>), 30.9 (CH<sub>3</sub>), 109.2 (CH), 117.0 (CH), 122.0 (C), 127.3 (CH), 130.0 (CH), 147.3 (CH) ppm; **GCMS** (EI):  $m/z$  (%): 77 (12), 91 (26), 106 (79), 120 (63), 121 (100) [ $\text{M}^+$ ]; **HRMS** (ESI-TOF):  $m/z$ : calcd for  $\text{C}_8\text{H}_{11}\text{N}$ : 122.0969 [ $\text{M}+\text{H}^+$ ]; found: 122.0972.

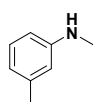

**N,3-dimethylaniline (1c):** Following the general procedure, N,3-dimethylaniline was obtained as a colourless liquid (120.2 mg, 99%, determined by GC using hexadecane as internal standard).

$^1\text{H NMR}$  (300 MHz,  $\text{CDCl}_3$ )  $\delta$  = 2.31 (q,  $J$ =0.7, 3H), 2.84 (s, 3H), 3.60 (s, 1H), 6.40 – 6.50 (m, 2H), 6.51 – 6.61 (m, 1H), 7.04 – 7.16 (m, 1H) ppm;  $^{13}\text{C NMR}$  (75 MHz,  $\text{CDCl}_3$ )  $\delta$  = 21.8 (CH<sub>3</sub>), 30.9 (CH<sub>3</sub>), 109.8 (CH), 113.3 (CH), 118.3 (CH), 129.2 (CH), 139.1 (C), 149.5 (C) ppm; **GCMS** (EI):  $m/z$  (%): 65 (6), 77 (8), 91 (19), 92 (5), 106 (7), 120 (100), 121 (82) [ $\text{M}^+$ ], 122 (7); **HRMS** (ESI-TOF):  $m/z$ : calcd for  $\text{C}_8\text{H}_{11}\text{N}$ : 122.0969 [ $\text{M}+\text{H}^+$ ]; found: 122.0973.

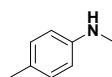

**N,4-dimethylaniline (1d):** Following the general procedure, N,4-dimethylaniline was obtained as a yellowish liquid (120.1 mg, 99%, determined by GC using hexadecane as internal standard).

$^1\text{H NMR}$  (300 MHz,  $\text{CDCl}_3$ )  $\delta$  = 2.27 (d,  $J$ =0.9, 3H), 2.83 (s, 3H), 3.42 (s, 1H), 6.52 – 6.62 (m, 2H), 6.97 – 7.13 (m, 2H) ppm;  $^{13}\text{C NMR}$  (75 MHz,  $\text{CDCl}_3$ )  $\delta$  = 20.5 (CH<sub>3</sub>), 31.2 (CH<sub>3</sub>), 112.7 (2 x CH), 126.6 (C), 129.8 (2 x CH), 147.3 (C) ppm; **GCMS** (EI):  $m/z$  (%): 77 (7), 91 (14), 106 (7), 120 (100), 121 (73) [ $\text{M}^+$ ], 122 (6); **HRMS** (ESI-TOF):  $m/z$ : calcd for  $\text{C}_8\text{H}_{11}\text{N}$ : 122.0969 [ $\text{M}+\text{H}^+$ ]; found: 122.0970.

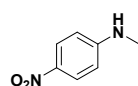

**N-methyl-4-nitroaniline (1e):** Following the general procedure except using 30 mol% NaOH and a reaction temperature of 80 °C, N-methyl-4-nitroaniline was obtained as a yellow solid (42.8 mg, 28%).

$^1\text{H NMR}$  (300 MHz, DMSO)  $\delta$  = 2.78 (d,  $J$ =5.0, 3H), 6.53 – 6.65 (m, 2H), 7.25 – 7.31 (m, 1H), 7.94 – 8.05 (m, 2H) ppm;  $^{13}\text{C NMR}$  (75 MHz, DMSO)  $\delta$  = 29.3 (CH<sub>3</sub>), 126.4 (4 x CH), 135.7 (C), 155.4 (C) ppm; **GCMS** (EI):  $m/z$  (%): 65 (19), 77 (30), 79 (18), 105 (13), 106 (17), 122 (45), 152 (100) [ $\text{M}^+$ ]; **HRMS** (ESI-TOF):  $m/z$ : calcd for  $\text{C}_7\text{H}_8\text{N}_2\text{O}_2$ : 153.0664 [ $\text{M}+\text{H}^+$ ]; found: 153.0668.

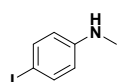

**4-iodo-N-methylaniline (1f):** Following the general procedure, 4-iodo-N-methylaniline was obtained as a violet oil (121.5 mg, 52%).

$^1\text{H NMR}$  (400 MHz,  $\text{CDCl}_3$ )  $\delta$  = 2.80 (s, 3H), 3.69 (s, 1H), 6.35 – 6.43 (m, 2H), 7.38 – 7.48 (m, 2H) ppm;  $^{13}\text{C NMR}$  (101 MHz,  $\text{CDCl}_3$ )  $\delta$  = 30.6 ( $\text{CH}_3$ ), 77.8 (C), 114.7 (2 x CH), 137.8 (2 x CH), 148.9 (C) ppm; **GCMS** (EI):  $m/z$  (%): 77 (6), 105 (6), 106 (6), 232 (31), 233 (100) [ $\text{M}^+$ ], 234 (8); **HRMS** (ESI-TOF):  $m/z$ : calcd for  $\text{C}_7\text{H}_8\text{NI}$ : 233.9779 [ $\text{M}+\text{H}$ ] $^+$ ; found: 233.9777.

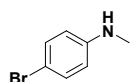

**4-bromo-N-methylaniline (1g):** Following the general procedure, 4-bromo-N-methylaniline was obtained as a colourless liquid (177.0 mg, 95%).

$^1\text{H NMR}$  (400 MHz,  $\text{CDCl}_3$ )  $\delta$  = 2.81 (s, 3H), 3.73 (s, 1H), 6.44 – 6.53 (m, 2H), 7.22 – 7.31 (m, 2H) ppm;  $^{13}\text{C NMR}$  (101 MHz,  $\text{CDCl}_3$ )  $\delta$  = 30.8 ( $\text{CH}_3$ ), 108.9 (C), 114.0 (2 x CH), 132.0 (2 x CH), 148.4 (C) ppm; **GCMS** (EI):  $m/z$  (%): 104 (12), 105 (17), 184 (80), 185 (100) [ $\text{M}^+$ ], 186 (83), 187 (98); **HRMS** (ESI-TOF):  $m/z$ : calcd for  $\text{C}_7\text{H}_9\text{BrN}$ : 185.9918 [ $\text{M}+\text{H}$ ] $^+$ ; found: 185.9919.

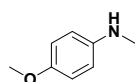

**4-methoxy-N-methylaniline (1h):** Following the general procedure, 4-methoxy-N-methylaniline was obtained as a yellowish liquid (116.7 mg, 85%).

$^1\text{H NMR}$  (400 MHz,  $\text{CDCl}_3$ )  $\delta$  = 2.82 (s, 3H), 3.38 (s, 1H), 3.77 (d,  $J=0.9$ , 3H), 6.56 – 6.65 (m, 2H), 6.79 – 6.85 (m, 2H) ppm;  $^{13}\text{C NMR}$  (101 MHz,  $\text{CDCl}_3$ )  $\delta$  = 31.7 ( $\text{CH}_3$ ), 55.9 ( $\text{CH}_3$ ), 113.7 (2 x CH), 115.0 (2 x CH), 143.8 (C), 152.1 (C) ppm; **GCMS** (EI):  $m/z$  (%): 65 (6), 94 (20), 122 (100), 123 (8), 137 (65) [ $\text{M}^+$ ], 138 (6); **HRMS** (ESI-TOF):  $m/z$ : calcd for  $\text{C}_8\text{H}_{11}\text{NO}$ : 138.0919 [ $\text{M}+\text{H}$ ] $^+$ ; found: 138.0921.

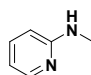

**N-methylpyridin-2-amine (1i):** Following the general procedure except using 30 mol% NaOH and a reaction temperature of 80 °C, N-methylpyridin-2-amine was obtained as a yellowish oil (16.3 mg, 15%).

$^1\text{H NMR}$  (400 MHz,  $\text{CDCl}_3$ )  $\delta$  = 2.90 (s, 3H), 4.61 (s, 1H), 6.37 (dt,  $J=8.4$ , 1.0, 1H), 6.56 (ddd,  $J=7.1$ , 5.0, 1.0, 1H), 7.42 (ddd,  $J=8.4$ , 7.1, 1.9, 1H), 8.08 (ddd,  $J=5.0$ , 1.9, 0.9, 1H) ppm;  $^{13}\text{C NMR}$  (101 MHz,  $\text{CDCl}_3$ )  $\delta$  = 29.2 ( $\text{CH}_3$ ), 106.3 (CH), 112.8 (CH), 137.5 (CH), 148.3 (CH), 159.7 (C) ppm; **GCMS** (EI):  $m/z$  (%): 51 (11), 52 (19), 78 (34), 79 (76), 80 (51), 107 (57), 108 (100) [ $\text{M}^+$ ]; **HRMS** (ESI-TOF):  $m/z$ : calcd for  $\text{C}_6\text{H}_8\text{N}_2$ : 109.0765 [ $\text{M}+\text{H}$ ] $^+$ ; found: 109.0769.

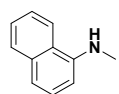

**N-methylnaphthalen-1-amine (1k):** Following the general procedure except using 30 mol% NaOH and a reaction temperature of 80 °C, N-methylnaphthalen-1-amine was obtained as a reddish-brown liquid (102.8 mg, 65%).

$^1\text{H NMR}$  (400 MHz,  $\text{CDCl}_3$ )  $\delta$  = 3.04 (s, 3H), 4.43 (s, 1H), 6.64 (dd,  $J=7.6$ , 1.0, 1H), 7.26 – 7.33 (m, 1H), 7.39 – 7.54 (m, 3H), 7.75 – 7.90 (m, 2H) ppm;  $^{13}\text{C NMR}$  (101 MHz,  $\text{CDCl}_3$ )  $\delta$  = 31.1 ( $\text{CH}_3$ ), 103.9 (CH), 117.4 (CH), 119.9 (CH), 123.5 (C), 124.8 (CH), 125.8 (CH), 126.8 (CH), 128.8 (CH), 134.3 (C), 144.6 (C) ppm; **GCMS** (EI):  $m/z$  (%): 115 (25), 127 (10), 128 (23), 129 (21), 156 (43), 157 (100) [ $\text{M}^+$ ], 158 (12); **HRMS** (ESI-TOF):  $m/z$ : calcd for  $\text{C}_{11}\text{H}_{11}\text{N}$ : 158.0969 [ $\text{M}+\text{H}$ ] $^+$ ; found: 158.0969.

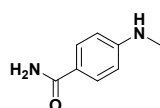

**4-(methylamino)benzamide (1l):** Following the general procedure except using 30 mol% NaOH and a reaction temperature of 80 °C, 4-(methylamino)benzamide was obtained as a faintly brownish solid (144.0 mg, 96%).

$^1\text{H NMR}$  (300 MHz, DMSO)  $\delta$  = 2.70 (d,  $J=5.0$ , 3H), 6.16 (q,  $J=5.0$ , 1H), 6.45 – 6.57 (m, 2H), 6.85 (s, 1H), 7.54 (s, 1H), 7.61 – 7.72 (m, 2H) ppm;  $^{13}\text{C NMR}$  (75 MHz, DMSO)  $\delta$  = 29.3 ( $\text{CH}_3$ ), 110.3 (2 x CH), 120.7 (C), 129.1

(2 x CH), 152.2 (C), 168.1 (C(O)NH<sub>2</sub>) ppm; **GCMS** (EI): *m/z* (%): 65 (6), 77 (13), 79 (10), 106 (14), 131 (8), 132 (9), 134 (100), 135 (9), 149 (6), 150 (90) [M<sup>+</sup>], 151 (9); **HRMS** (ESI-TOF): *m/z*: calcd for C<sub>8</sub>H<sub>10</sub>N<sub>2</sub>O: 151.0871 [M+H]<sup>+</sup>; found: 151.0870.

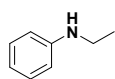

**N-ethylaniline (3a):** Following the general procedure, N-ethylaniline was obtained as a colorless liquid (82.1 mg, 68%, determined by GC using hexadecane as internal standard).

<sup>1</sup>H NMR (400 MHz, CDCl<sub>3</sub>) δ = 1.27 (t, *J*=7.1, 3H), 3.17 (q, *J*=7.1, 2H), 3.50 (s, 1H), 6.58 – 6.66 (m, 2H), 6.67 – 6.76 (m, 1H), 7.14 – 7.24 (m, 2H) ppm; <sup>13</sup>C NMR (101 MHz, CDCl<sub>3</sub>) δ = 15.0 (CH<sub>3</sub>), 38.6 (CH<sub>2</sub>), 112.9 (2 x CH), 117.3 (CH), 129.3 (2 x CH), 148.6 (C) ppm; **GCMS** (EI): *m/z* (%): 77 (16), 79 (8), 106 (100), 107 (8), 120 (6), 121 (43) [M<sup>+</sup>]; **HRMS** (ESI-TOF): *m/z*: calcd for C<sub>8</sub>H<sub>11</sub>N: 122.0969 [M+H]<sup>+</sup>; found: 122.0972.

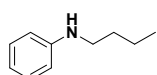

**N-butylaniline (3b):** Following the general procedure, N-butylaniline was obtained as a colourless liquid (63.4 mg, 43%).

<sup>1</sup>H NMR (300 MHz, CDCl<sub>3</sub>) δ = 0.99 (t, *J*=7.3, 3H), 1.37 – 1.57 (m, 2H), 1.53 – 1.71 (m, 2H), 3.08 – 3.20 (m, 2H), 3.59 (s, 1H), 6.57 – 6.67 (m, 2H), 6.71 (tt, *J*=7.4, 1.1, 1H), 7.13 – 7.26 (m, 2H) ppm; <sup>13</sup>C NMR (75 MHz, CDCl<sub>3</sub>) δ = 14.0 (CH<sub>3</sub>), 20.4 (CH<sub>2</sub>), 31.8 (CH<sub>2</sub>), 43.8 (CH<sub>2</sub>), 112.8 (2 x CH), 117.2 (CH), 129.3 (2 x CH), 148.7 (C) ppm; **GCMS** (EI): *m/z* (%): 77 (10), 106 (100), 107 (9), 149 (25) [M<sup>+</sup>]; **HRMS** (ESI-TOF): *m/z*: calcd for C<sub>10</sub>H<sub>15</sub>N: 150.1283 [M+H]<sup>+</sup>; found: 150.1284.

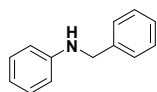

**N-benzylaniline (3c):** Following the general procedure, N-benzylaniline was obtained as a colourless oil (52.4 mg, 29%).

<sup>1</sup>H NMR (400 MHz, CDCl<sub>3</sub>) δ = 4.05 (s, 1H), 4.37 (s, 2H), 6.64 – 6.72 (m, 2H), 6.76 (tt, *J*=7.4, 1.1, 1H), 7.17 – 7.28 (m, 2H), 7.25 – 7.37 (m, 1H), 7.37 – 7.45 (m, 4H) ppm; <sup>13</sup>C NMR (101 MHz, CDCl<sub>3</sub>) δ = 48.4 (CH<sub>3</sub>), 112.9 (2 x CH), 117.7 (CH), 127.3 (CH), 127.6 (2 x CH), 128.8 (2 x CH), 129.4 (2 x CH), 139.6 (C), 148.3 (C) ppm; **GCMS** (EI): *m/z* (%): 65 (11), 77 (13), 91 (83), 106 (18), 182 (37), 183 (100) [M<sup>+</sup>], 184 (14); **HRMS** (ESI-TOF): *m/z*: calcd for C<sub>13</sub>H<sub>13</sub>N: 184.1126 [M+H]<sup>+</sup>; found: 184.1122.

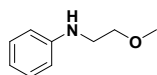

**N-(2-methoxyethyl)aniline (3d):** Following the general procedure except using 30 mol% NaOH and a reaction temperature of 80 °C, N-(2-methoxyethyl)aniline was obtained as a colourless liquid (86.9 mg, 57%).

<sup>1</sup>H NMR (400 MHz, CDCl<sub>3</sub>) δ = 3.31 (dd, *J*=5.6, 4.8, 2H), 3.41 (s, 3H), 3.62 (dd, *J*=5.7, 4.8, 2H), 4.02 (s, 1H), 6.61 – 6.69 (m, 2H), 6.73 (tt, *J*=7.3, 1.1, 1H), 7.15 – 7.25 (m, 2H) ppm; <sup>13</sup>C NMR (101 MHz, CDCl<sub>3</sub>) δ = 43.6 (CH<sub>2</sub>), 58.9 (CH<sub>3</sub>), 71.1 (CH<sub>2</sub>), 113.2 (2 x CH), 117.7 (CH), 129.3 (2 x CH), 148.3 (C) ppm; **GCMS** (EI): *m/z* (%): 77 (13), 79 (6), 106 (100), 107 (8), 151 (25) [M<sup>+</sup>]; **HRMS** (ESI-TOF): *m/z*: calcd for C<sub>9</sub>H<sub>13</sub>NO: 152.1075 [M+H]<sup>+</sup>; found: 152.1075.

## X-ray crystal structure analysis of ruthenium complex 9

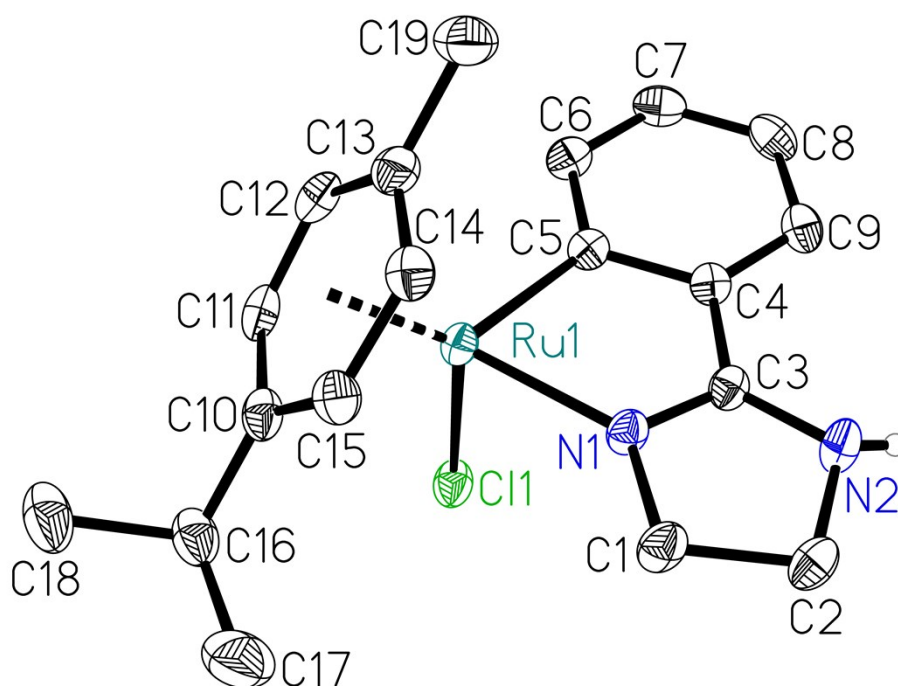

**Molecular structure of ruthenium complex 9 in the crystal.** Displacement ellipsoids correspond to 50% probability. Carbon-bound hydrogen atoms are omitted for clarity.

Data were collected on a Bruker Kappa APEX II Duo diffractometer. The structure was solved by direct methods (SHELXS-97: Sheldrick, G. M. *Acta Cryst.* **2008**, A64, 112.) and refined by full-matrix least-squares procedures on  $F^2$  (SHELXL-2018: Sheldrick, G. M. *Acta Cryst.* **2015**, C71, 3.). XP (Bruker AXS) was used for graphical representation.

CCDC 2038933 contains the supplementary crystallographic data for this paper. These data are provided free of charge by the joint Cambridge Crystallographic Data Centre and Fachinformationszentrum Karlsruhe Access Structures service [www.ccdc.cam.ac.uk/structures](http://www.ccdc.cam.ac.uk/structures).

Crystal data of ruthenium complex **9**:  $C_{19}H_{23}ClN_2Ru$ ,  $M = 415.91$ , monoclinic, space group  $P2_1/n$ ,  $a = 10.2420(8)$ ,  $b = 13.4921(11)$ ,  $c = 12.6747(10)$  Å,  $\beta = 94.3124(14)^\circ$ ,  $V = 1746.5(2)$  Å<sup>3</sup>,  $T = 150(2)$  K,  $Z = 4$ , 42533 reflections measured, 4226 independent reflections ( $R_{int} = 0.0226$ ), final  $R$  values ( $I > 2\sigma(I)$ ):  $R_1 = 0.0197$ ,  $wR_2 = 0.0497$ , final  $R$  values (all data):  $R_1 = 0.0217$ ,  $wR_2 = 0.0515$ , 214 parameters.

# NMR and IR Spectra

Piehl, PP 518 A  
Au1H CDCl3 {C:\Bruker\TopSpin3.5pl6} 1807 30  
180717.430.10.fid  
1H CDCl3

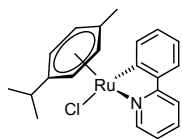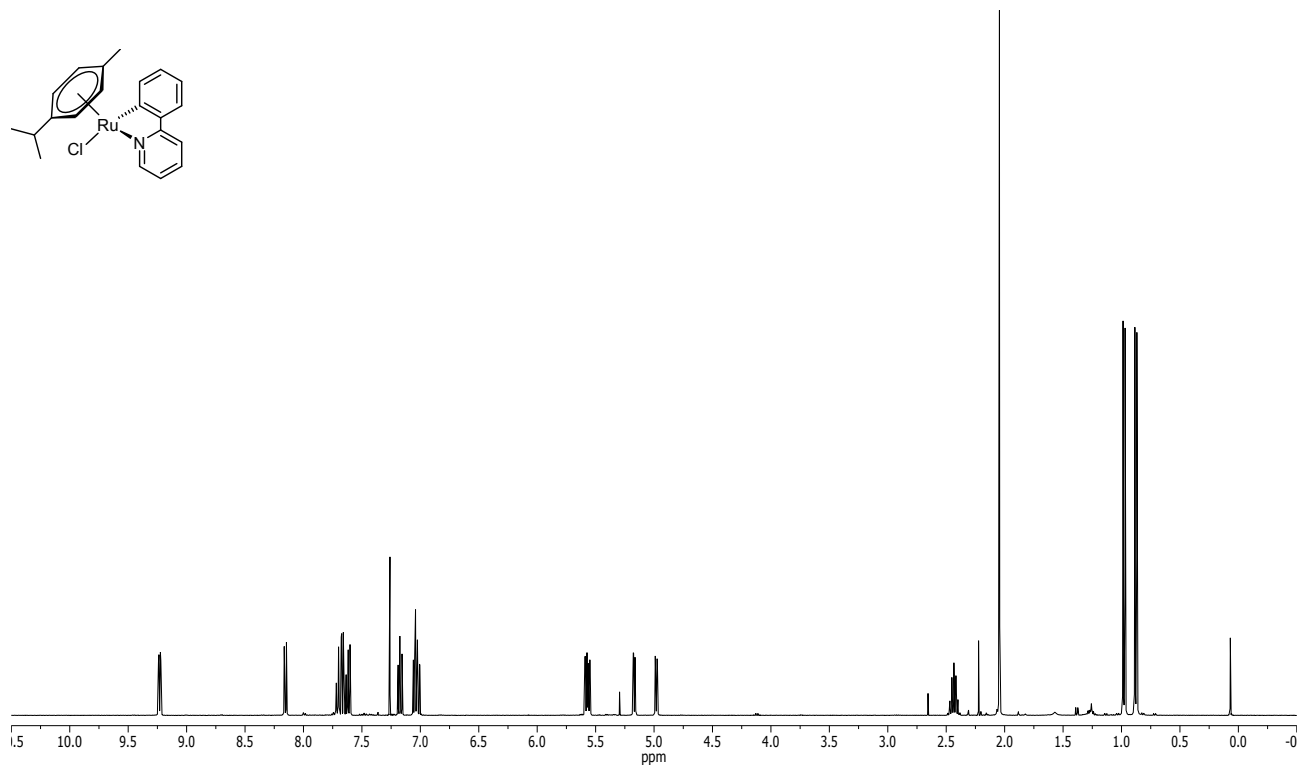

Piehl, PP 518 A  
Au13C CDCl3 {C:\Bruker\TopSpin3.5pl6} 1807 30  
180717.430.11.fid  
13C CDCl3

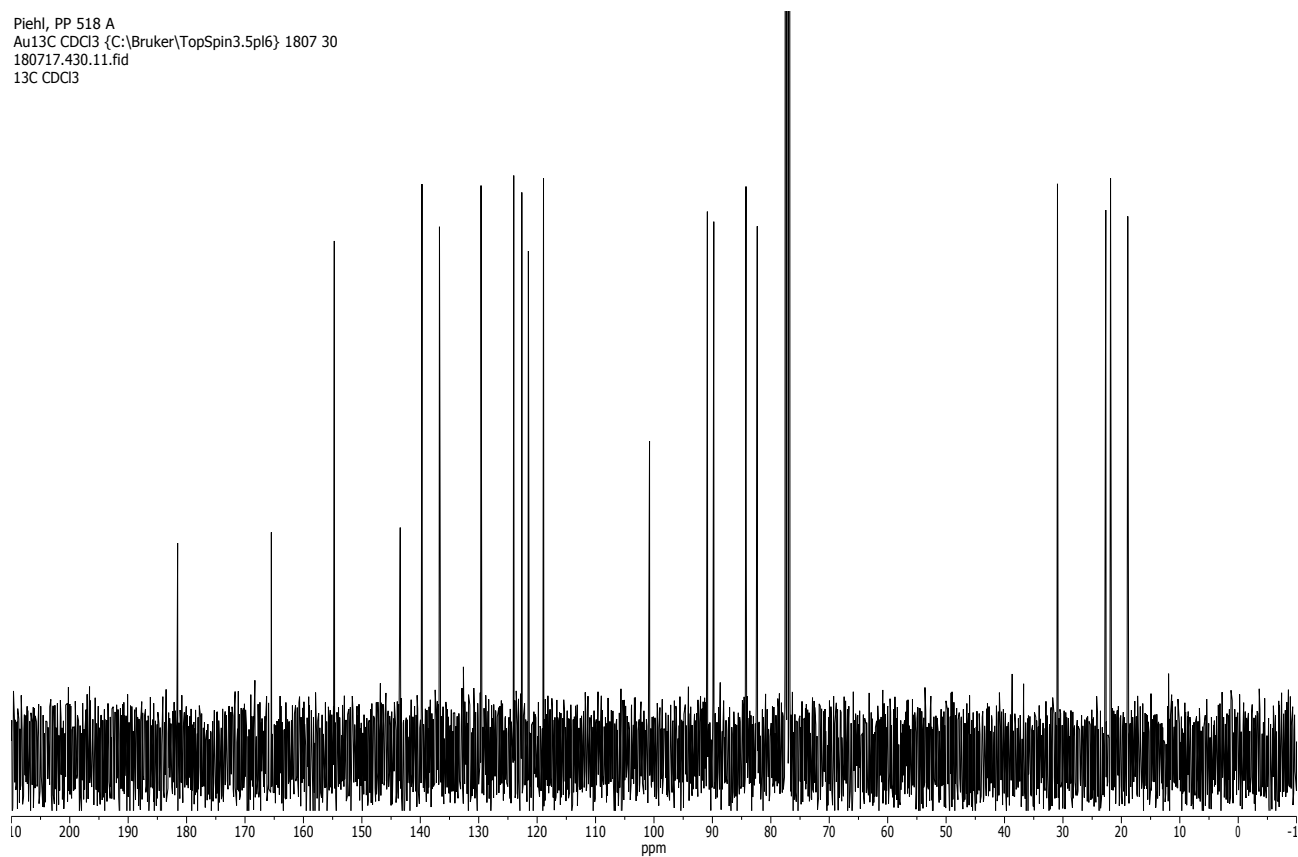

Piehl PP579  
Au1H CDCl3 {C:\Bruker\TopSpin3.5pl6} 1810 46  
181005.346.10.fid  
1H CDCl3

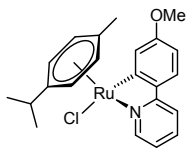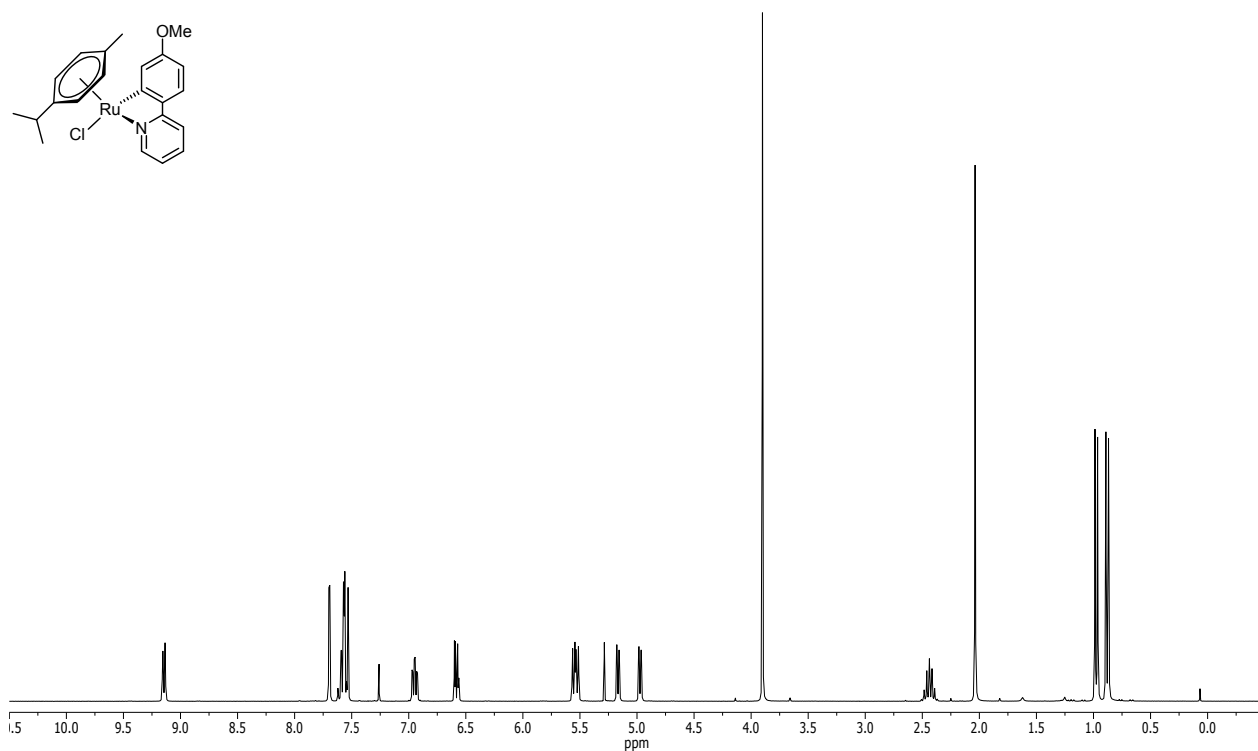

Piehl PP579  
Au13C CDCl3 {C:\Bruker\TopSpin3.5pl6} 1810 46  
181005.346.11.fid  
13C CDCl3

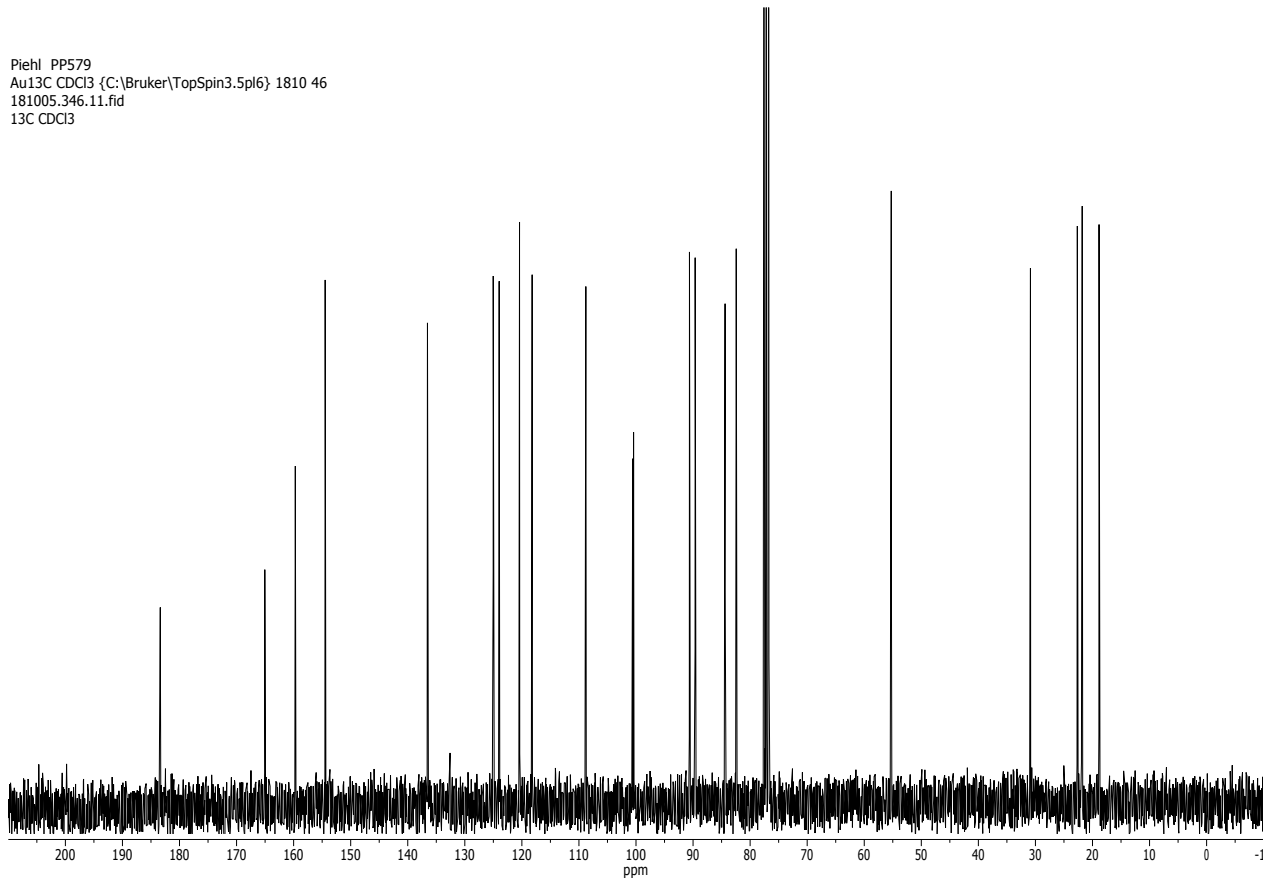



Piehl PP578  
Au1H CDCl3 {C:\Bruker\TopSpin3.5pl6} 1810 45  
181005.345.10.fid  
1H CDCl3

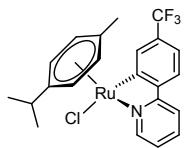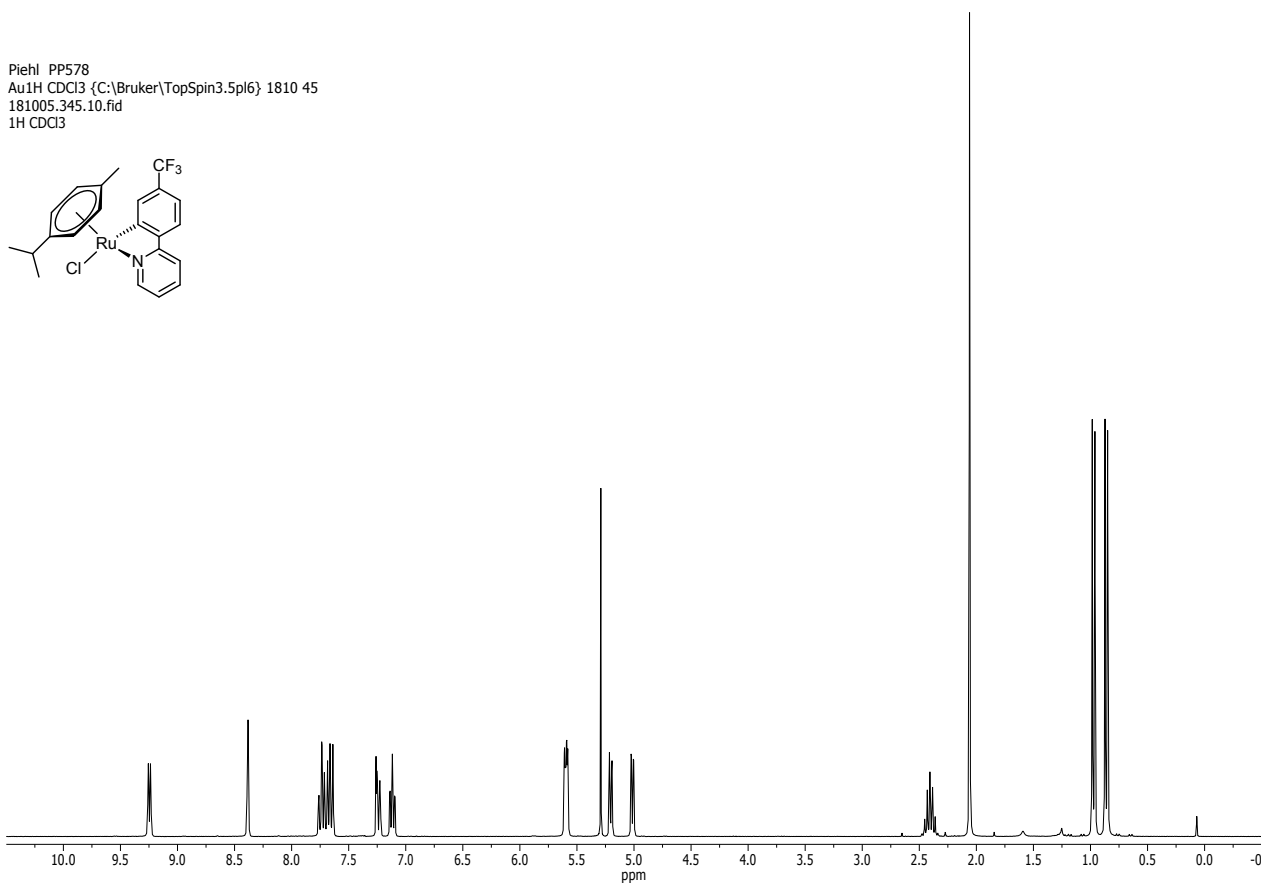

Piehl PP578  
Au13C CDCl3 {C:\Bruker\TopSpin3.5pl6} 1810 45  
181005.345.11.fid  
13C CDCl3

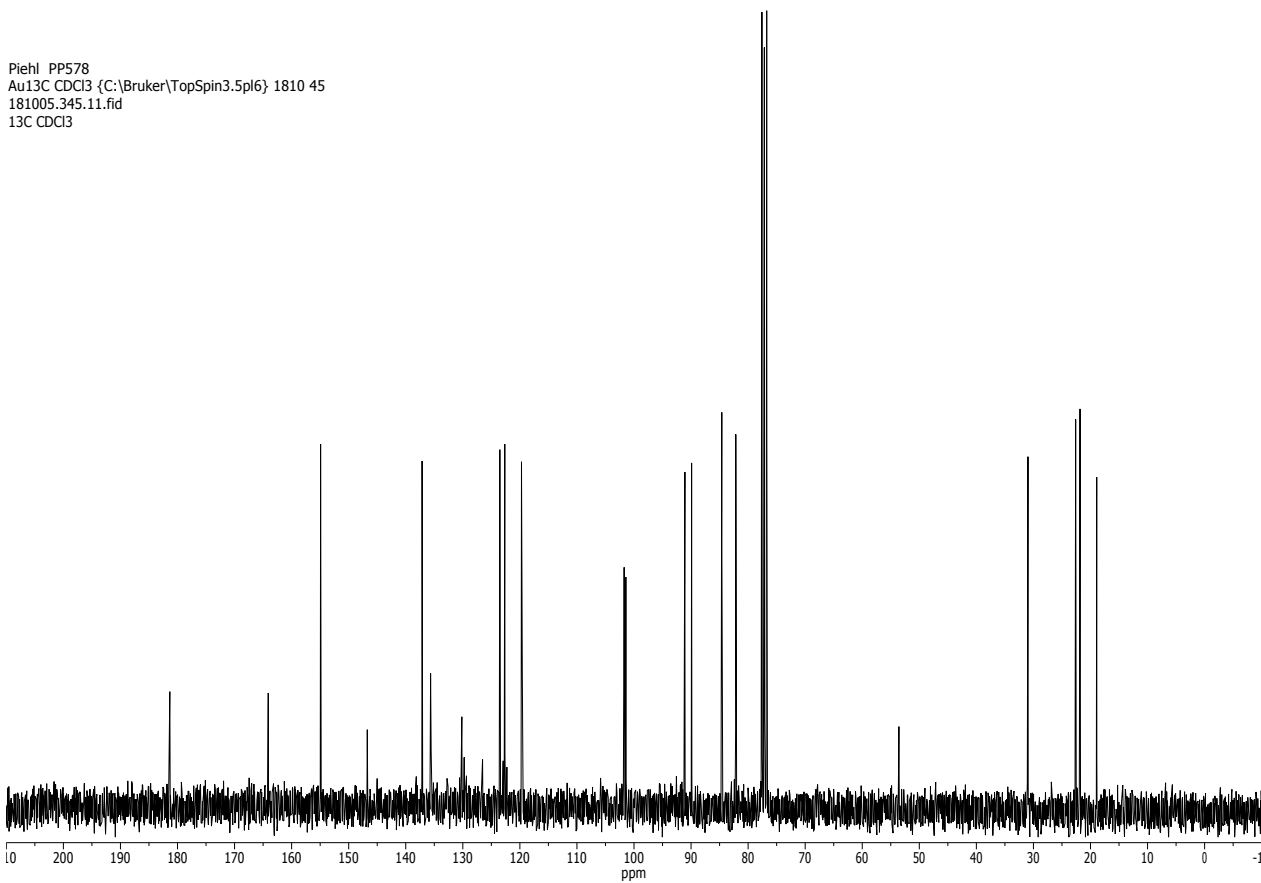

Piehl PP578  
Au19F CDCI3 {C:\Bruker\TopSpin3.5pl6} 1810 45  
181005.345.13.fid  
19F CDCI3

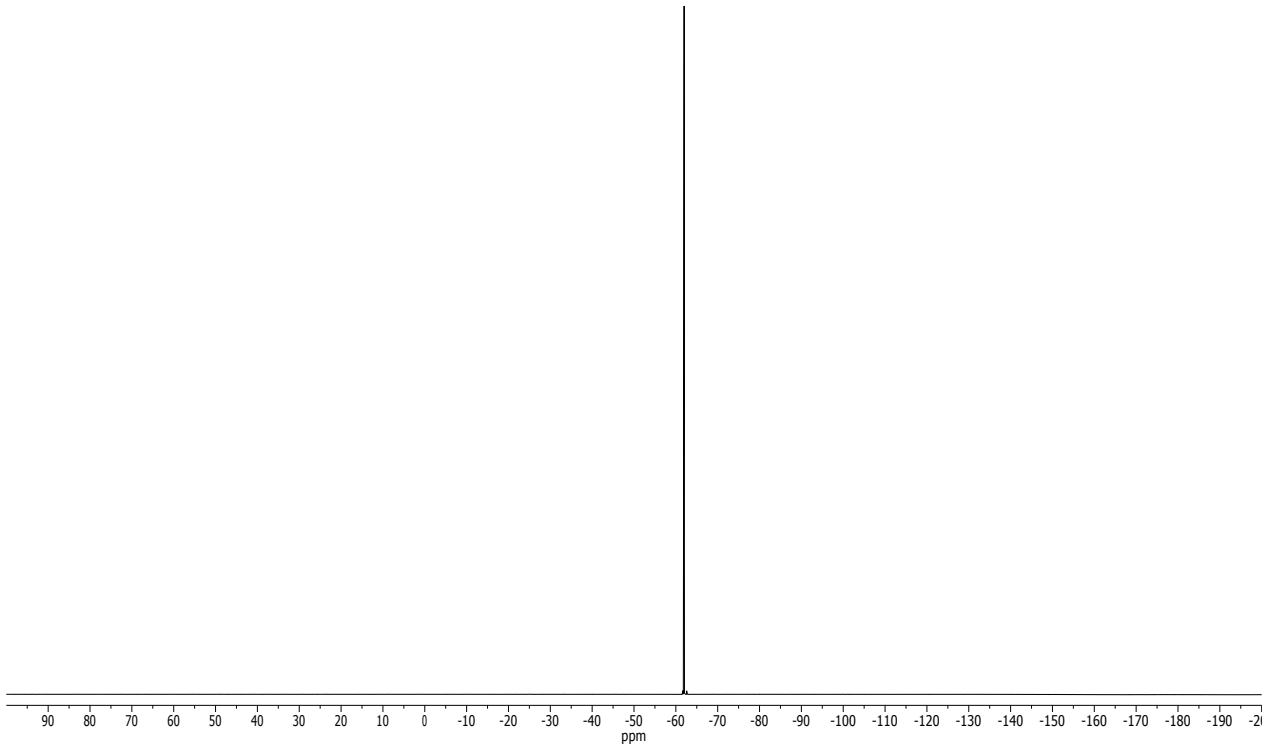

Piehl PP 556  
Au1H CDCl3 {C:\Bruker\TopSpin3.5pl6} 1808 6  
180828.406.10.fid  
1H CDCl3

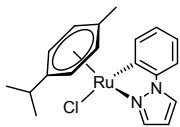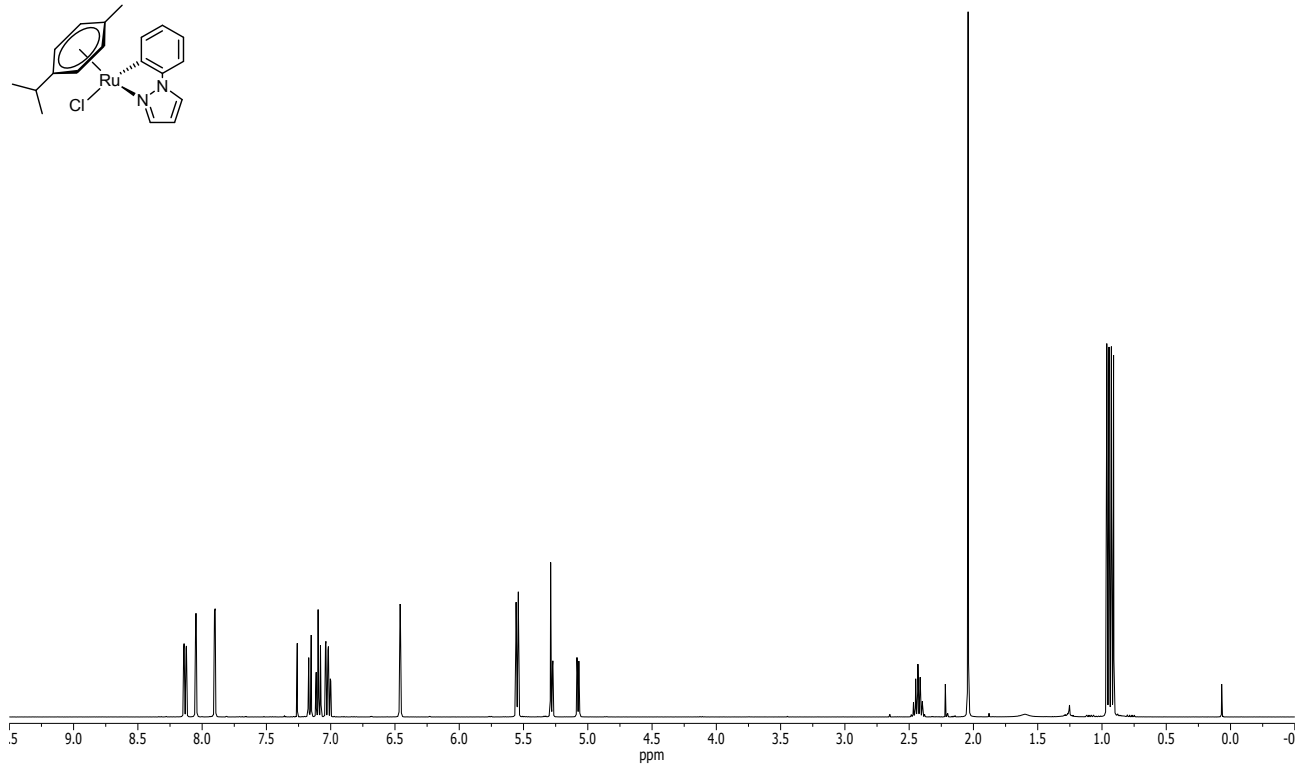

Piehl PP 556  
Au13C CDCl3 {C:\Bruker\TopSpin3.5pl6} 1808 6  
180828.406.11.fid  
13C CDCl3

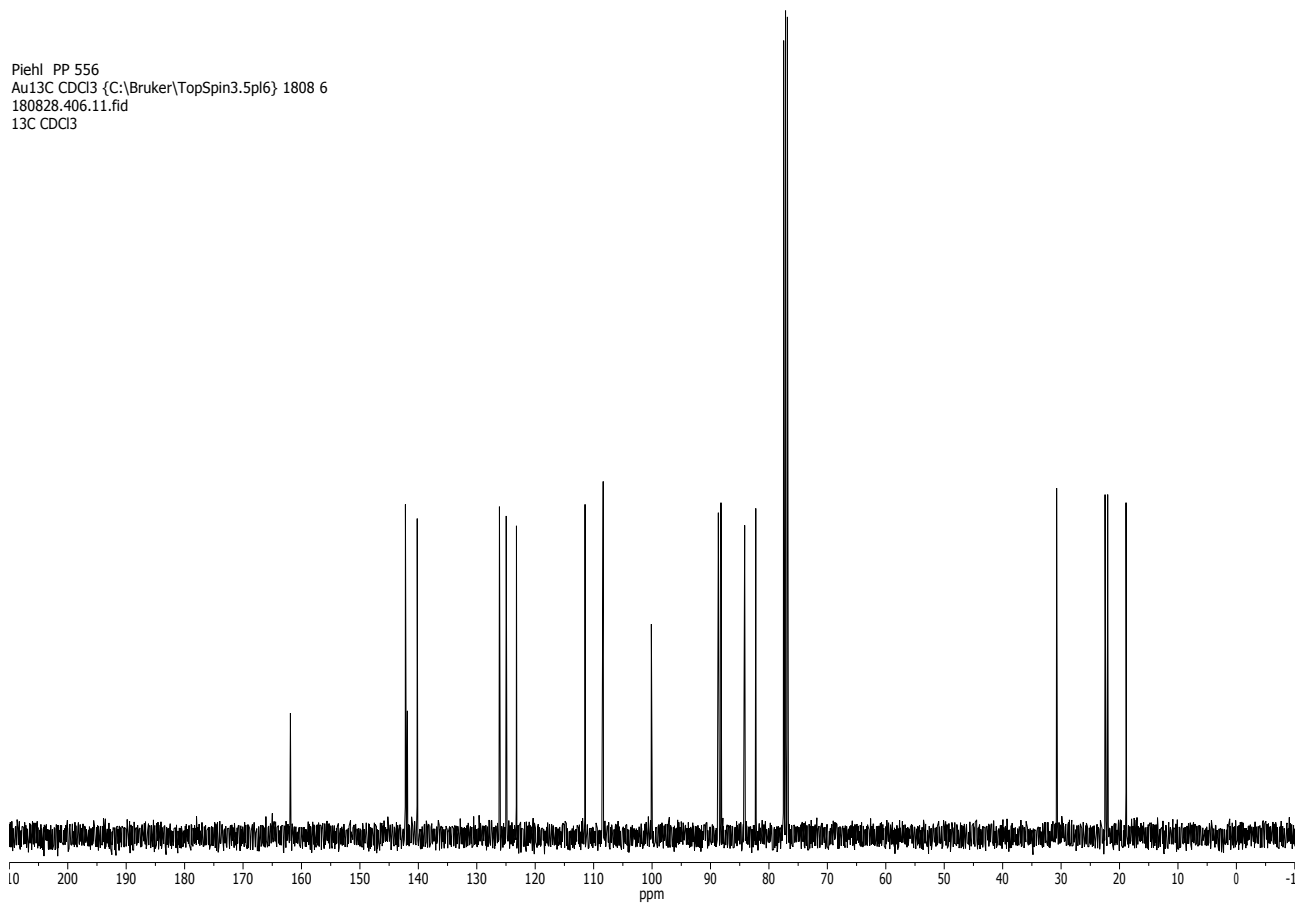

Piehl PP 538A  
Au1H CDCl3 {C:\Bruker\TopSpin3.5pl6} 1807 40  
180730.440.10.fid  
1H CDCl3

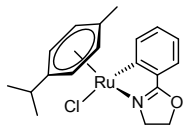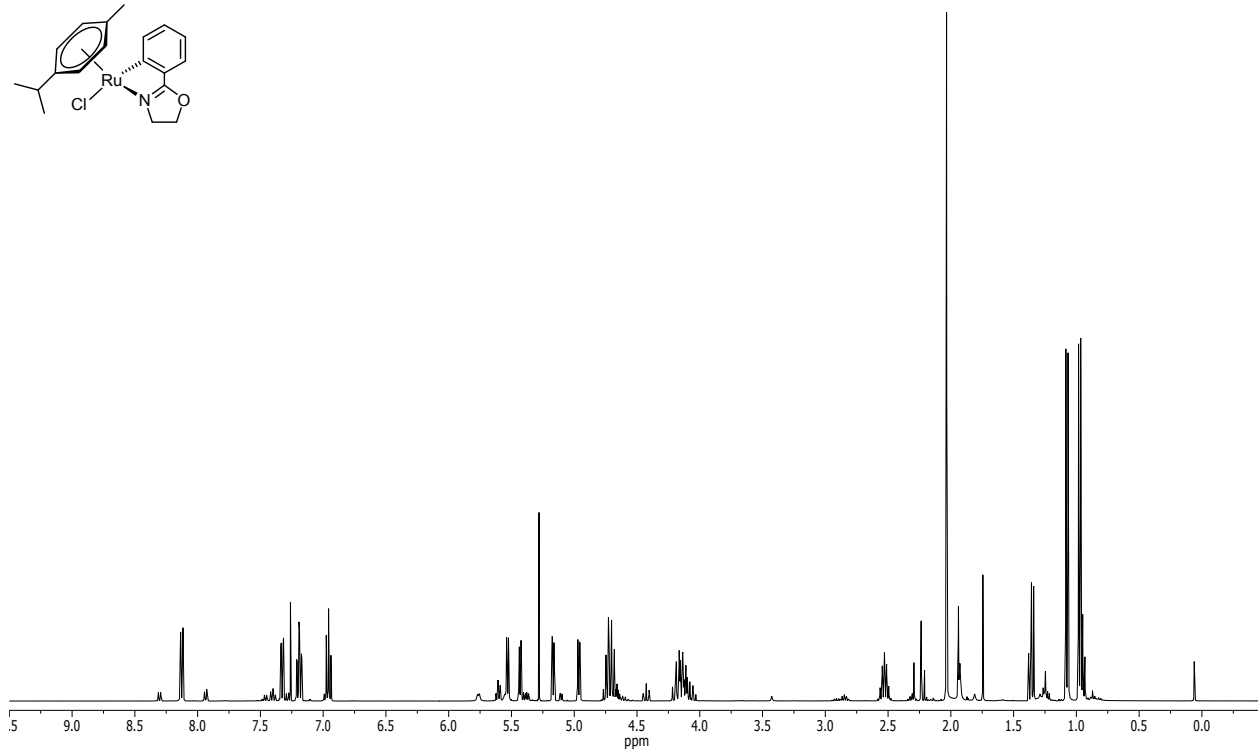

Piehl PP 538A  
Au13C CDCl3 {C:\Bruker\TopSpin3.5pl6} 1807 40  
180730.440.11.fid  
13C CDCl3

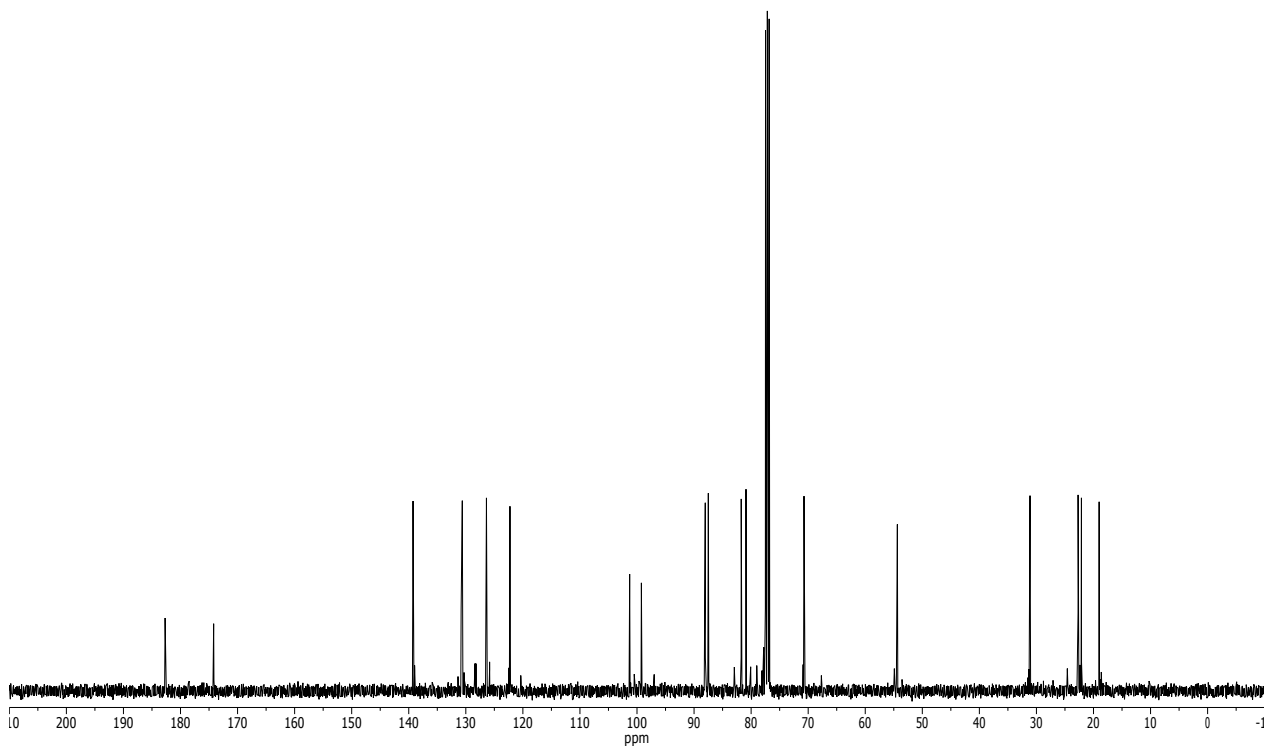

Piehl PP 560  
Au1H CD2Cl2 {C:\Bruker\TopSpin3.5pl6} 1809 13  
180904.413.10.fid  
1H CD2Cl2

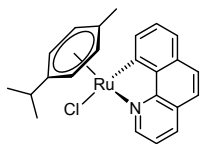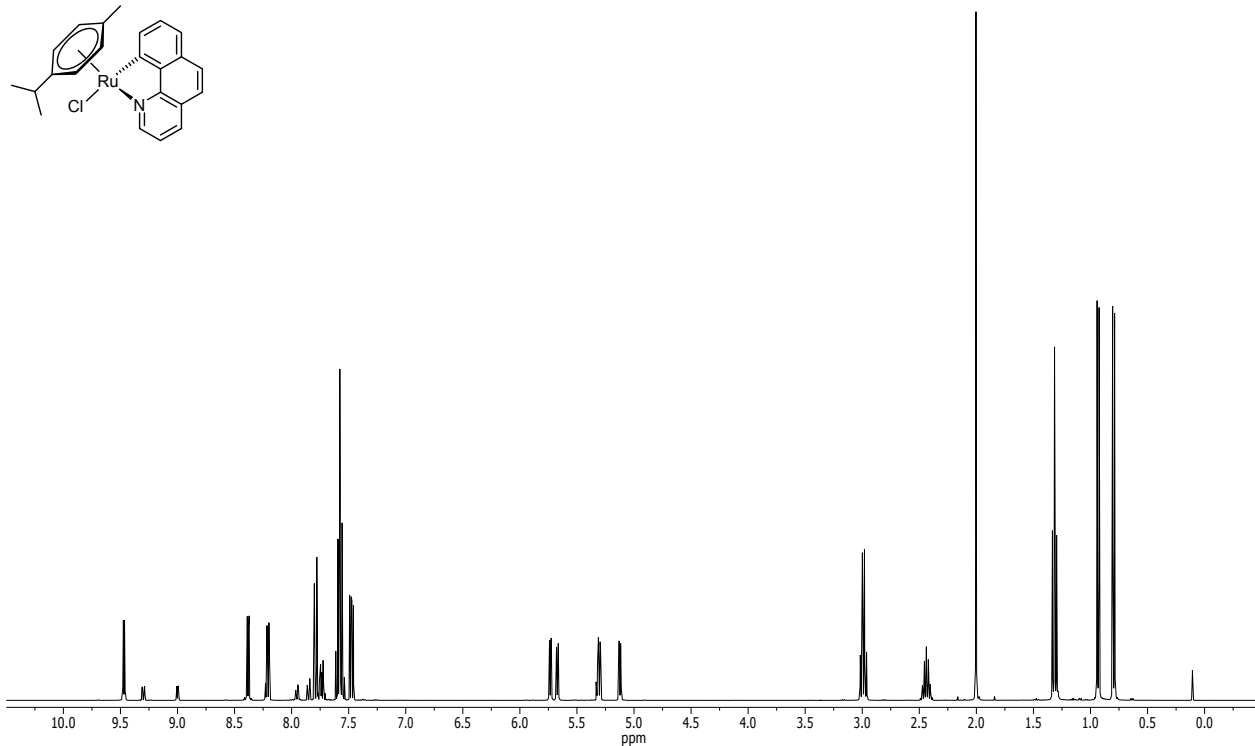

Piehl PP 560  
Au13C CD2Cl2 {C:\Bruker\TopSpin3.5pl6} 1809 13  
180904.413.11.fid  
13C CD2Cl2

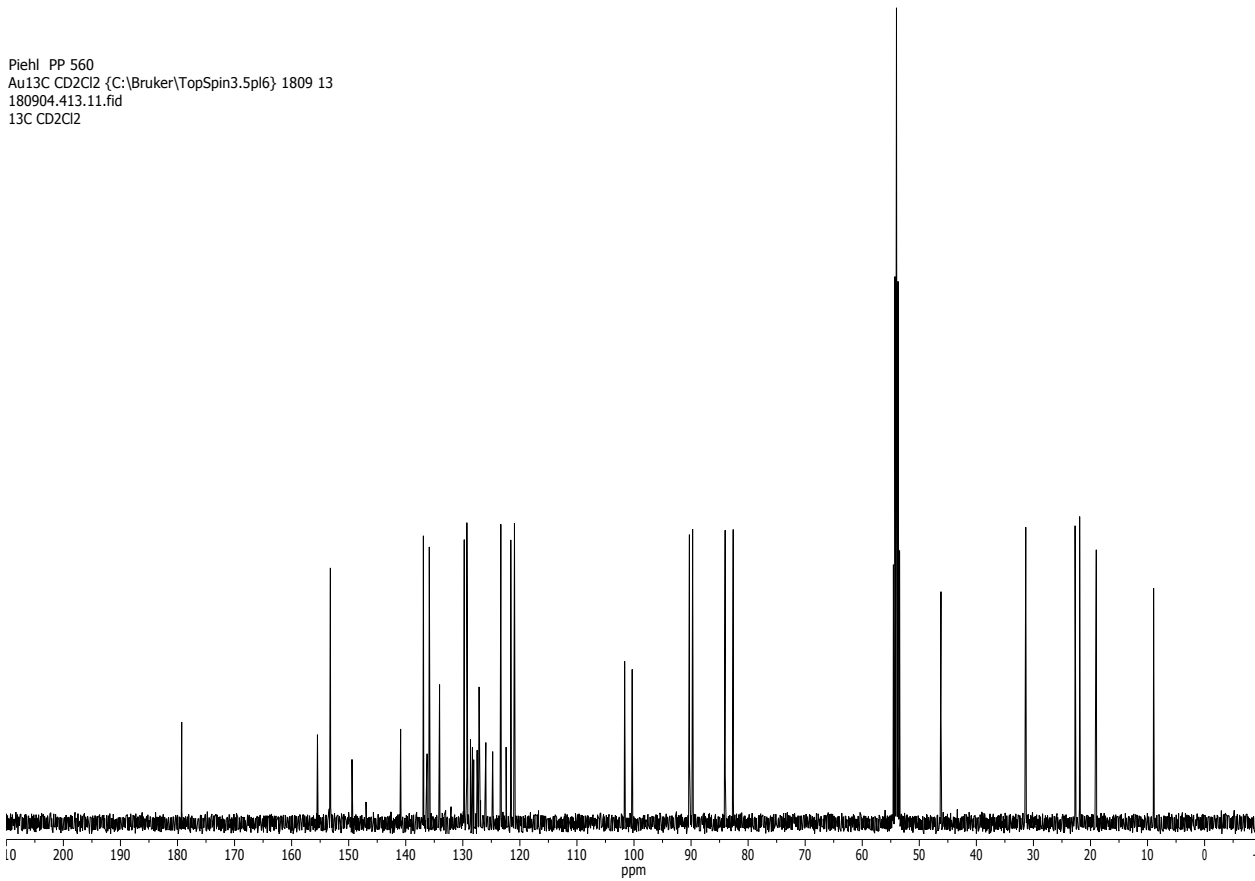

Piehl PP 1005  
PROTON CDCl3 {C:\Bruker\TopSpin3.6.0} 2002 8  
200210.f368.10.fid  
1H CDCl3

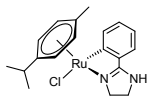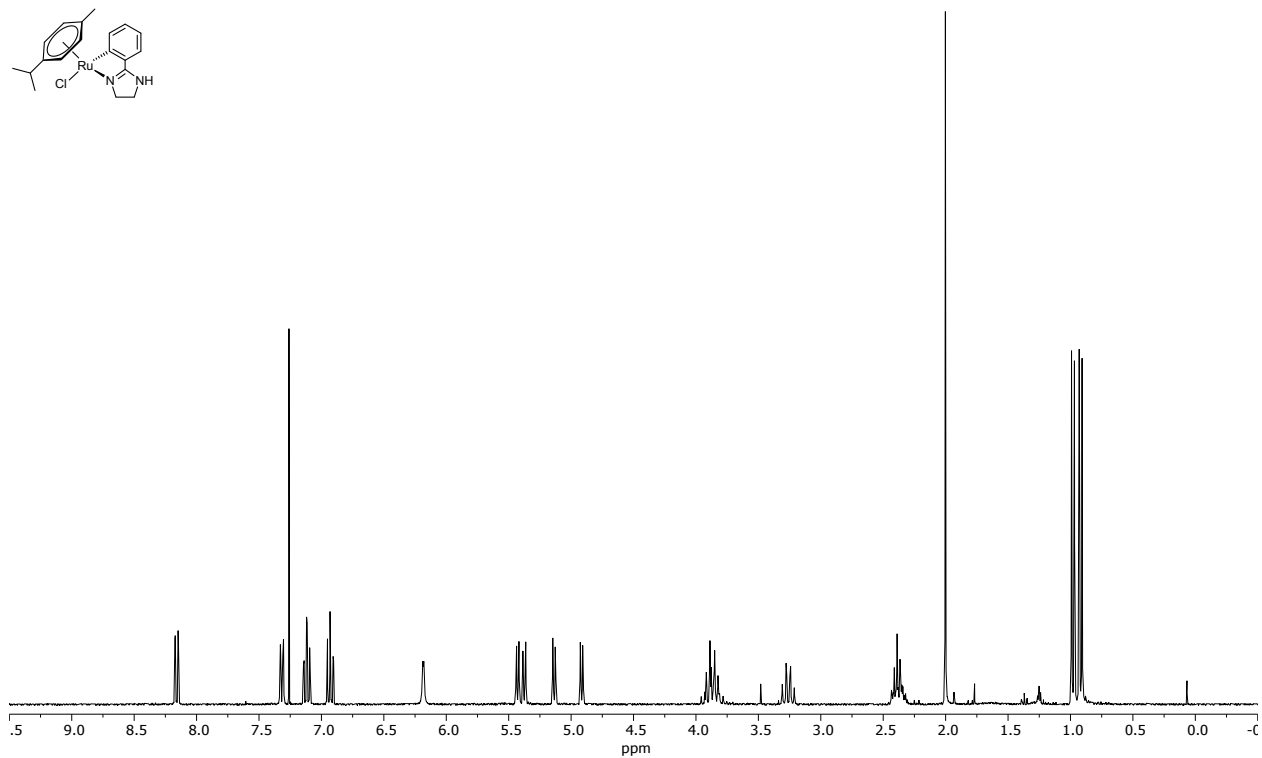

Piehl PP 1005  
C13CPD CDCl3 {C:\Bruker\TopSpin3.6.0} 2002 8  
200210.f368.11.fid  
13C CDCl3

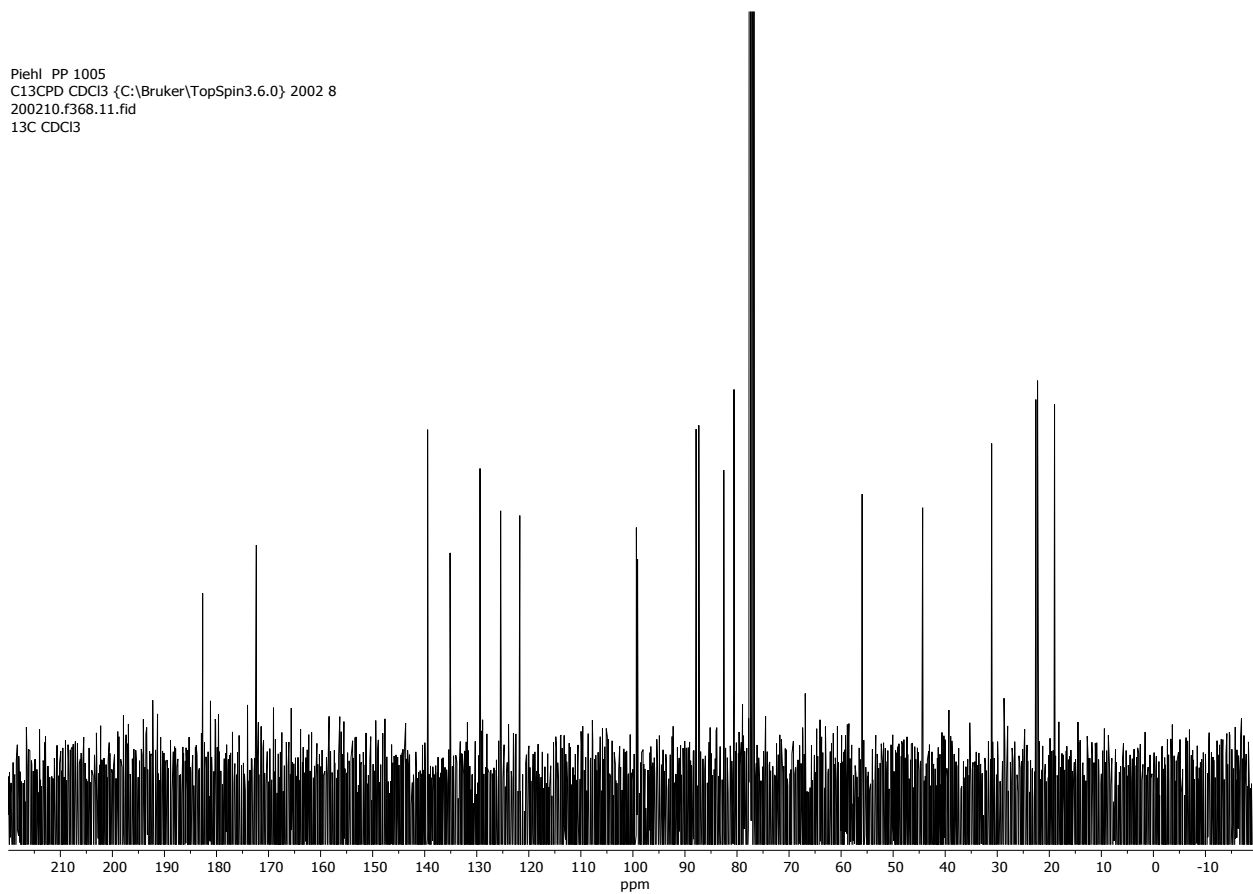

Piehl PP 984B  
PROTON CDCl3 {C:\Bruker\TopSpin3.6.0} 2001 40  
200115.f340.10.fid  
1H CDCl3

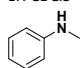

1a

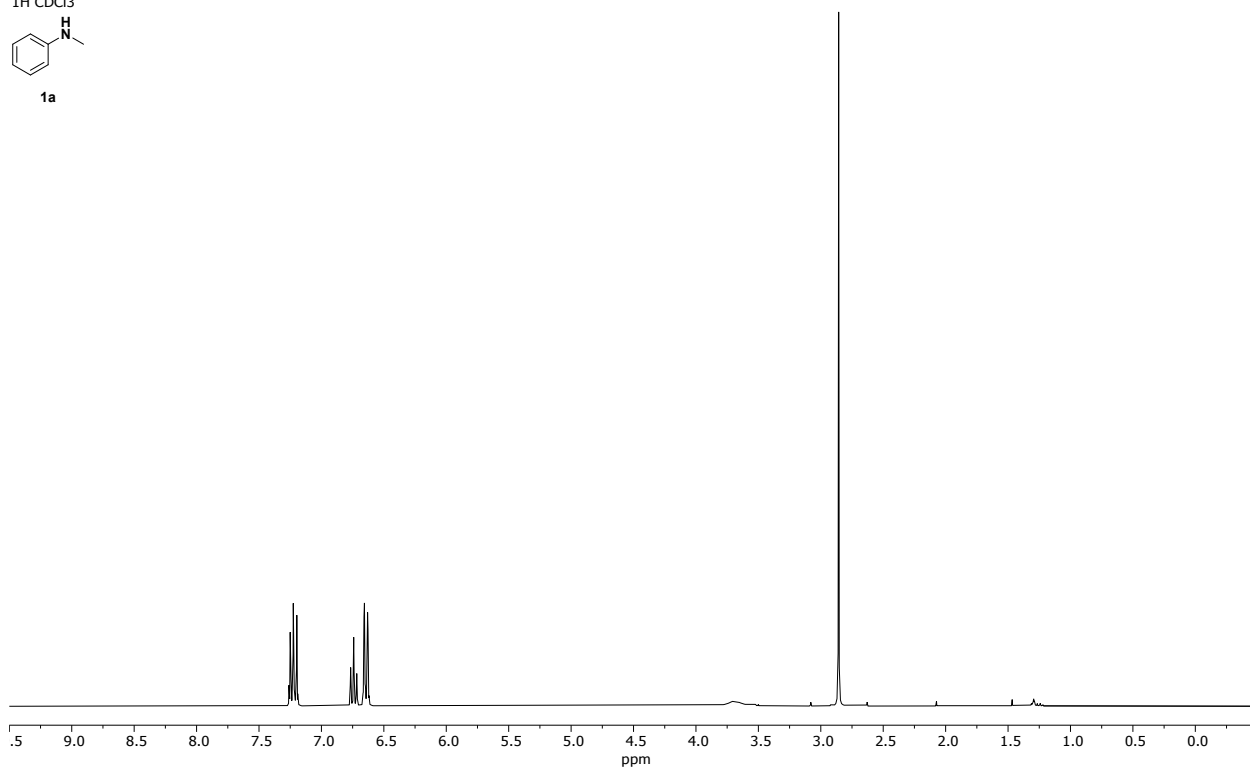

Piehl PP 984B  
C13CPD CDCl3 {C:\Bruker\TopSpin3.6.0} 2001 40  
200115.f340.11.fid  
13C CDCl3

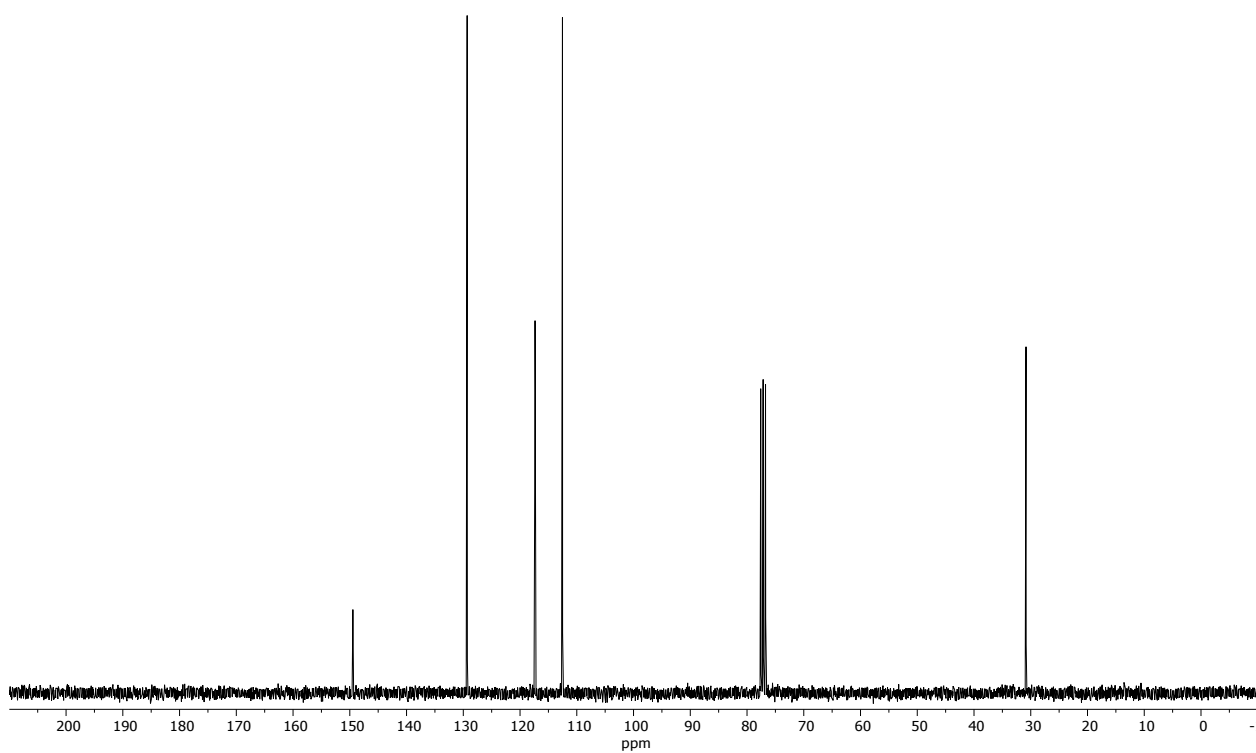

Piehl / PP1053B  
Au1H CDCl3 {C:\Bruker\TopSpin3.5pl6} 2003 38  
200323.438.10.fid  
1H CDCl3

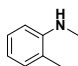

1b

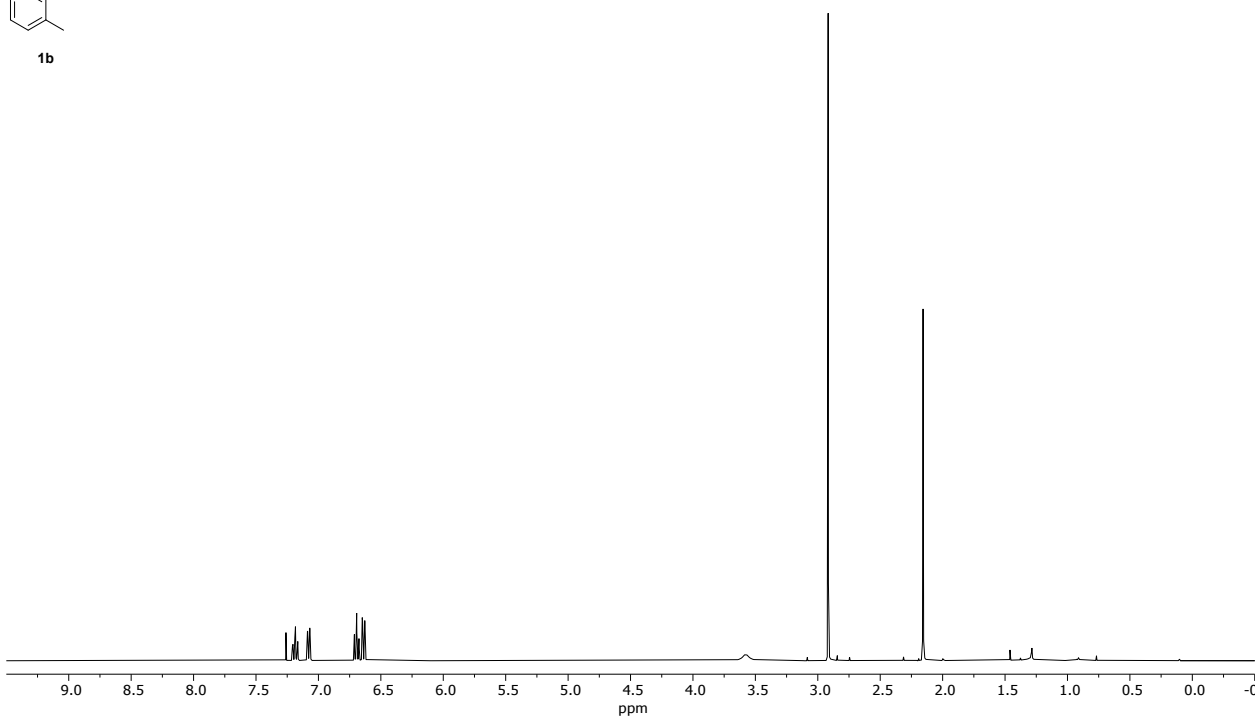

Piehl / PP1053B  
Au13C CDCl3 {C:\Bruker\TopSpin3.5pl6} 2003 38  
200323.438.11.fid  
13C CDCl3

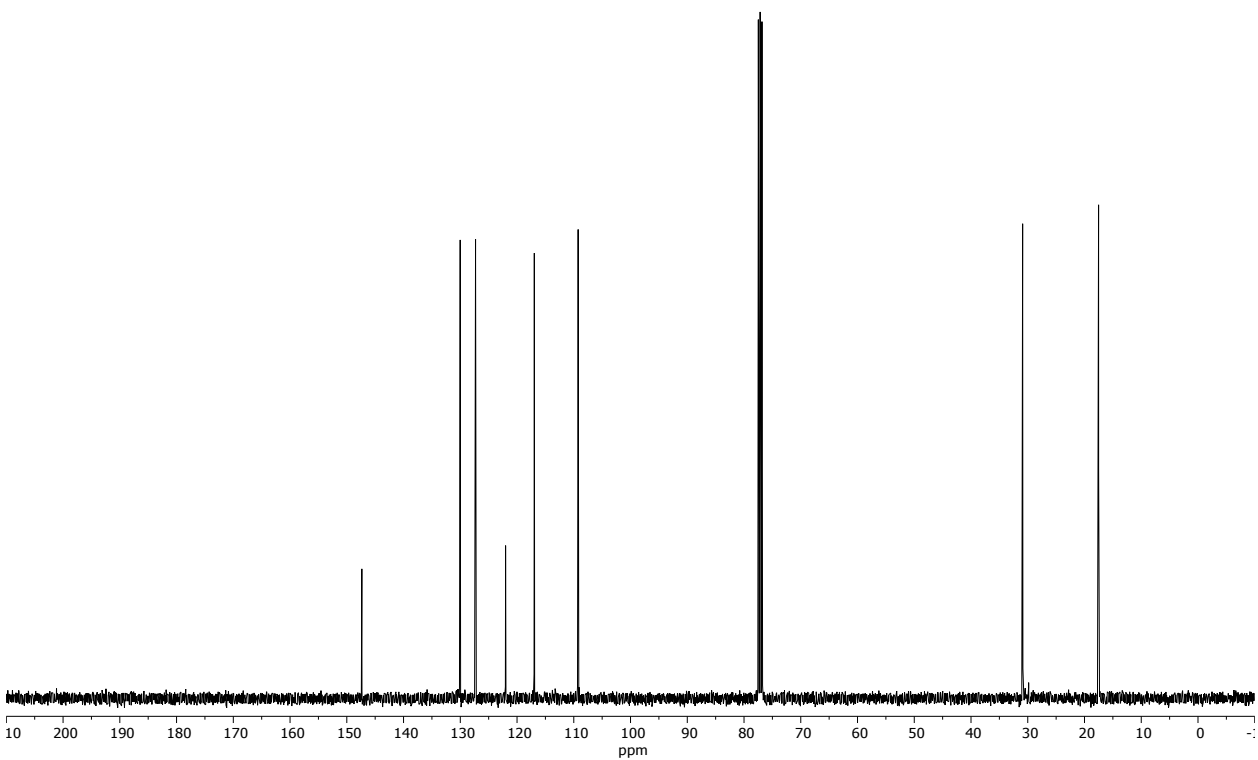



Piehl PP 1001 B  
Au1H CDCl3 {C:\Bruker\TopSpin3.6.0} 2002 11  
200211.311.10.fid  
1H CDCl3

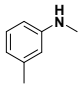

1c

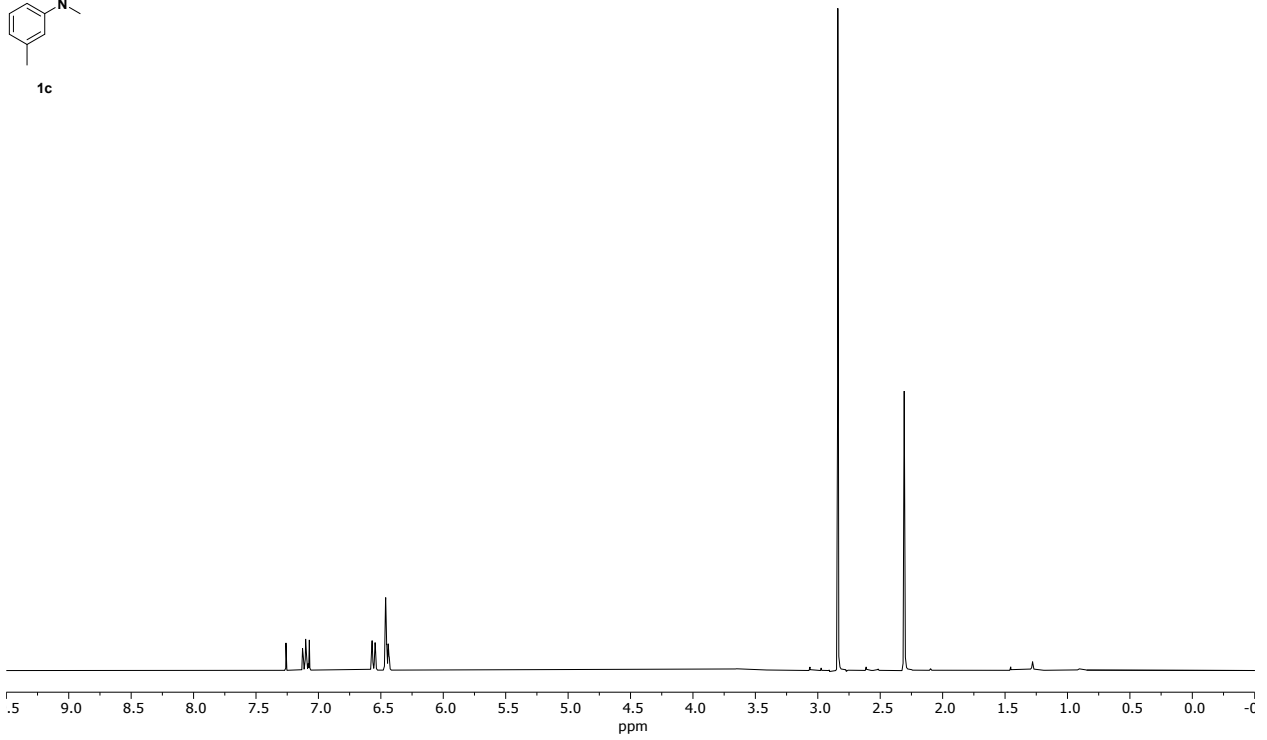

Piehl PP 1001 B  
Au13C CDCl3 {C:\Bruker\TopSpin3.6.0} 2002 11  
200211.311.11.fid  
13C CDCl3

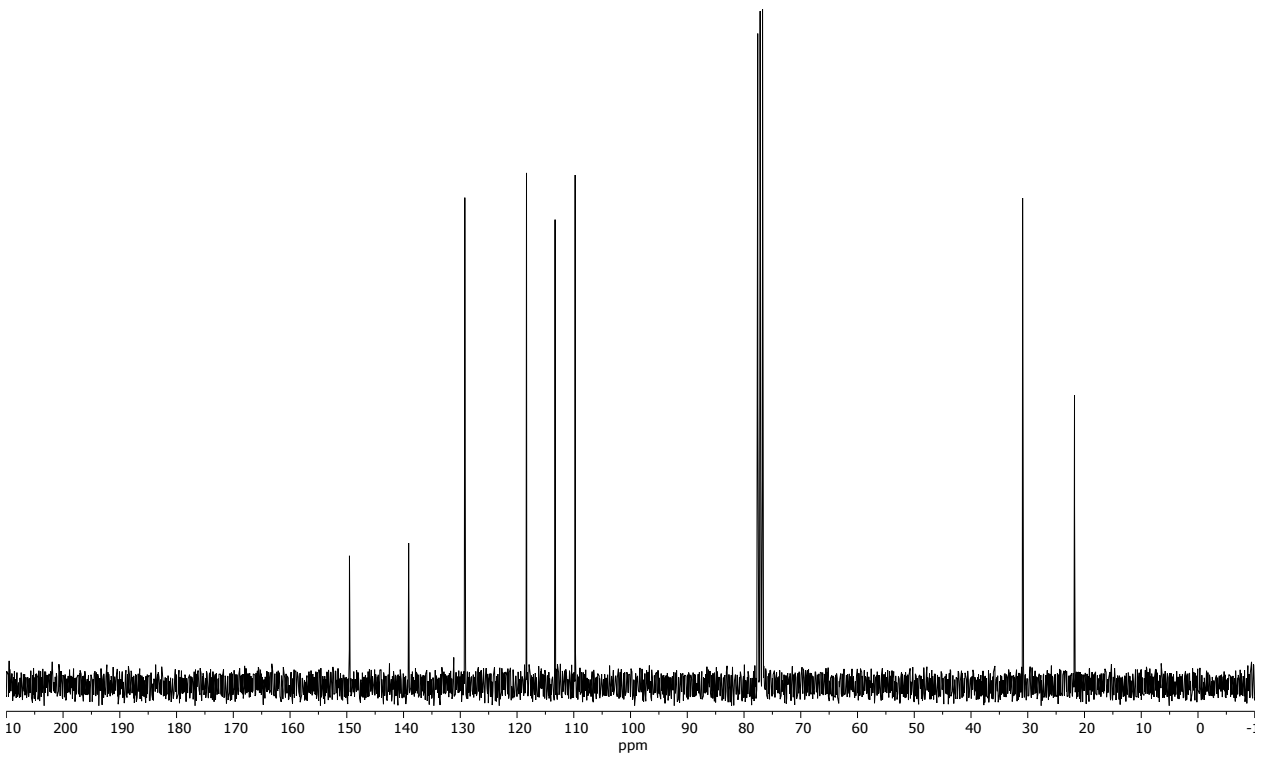

Piehl PP 994  
PROTON CDCl3 {C:\Bruker\TopSpin3.6.0} 2001 39  
200129.f339.10.fid  
1H CDCl3

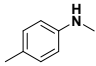

1d

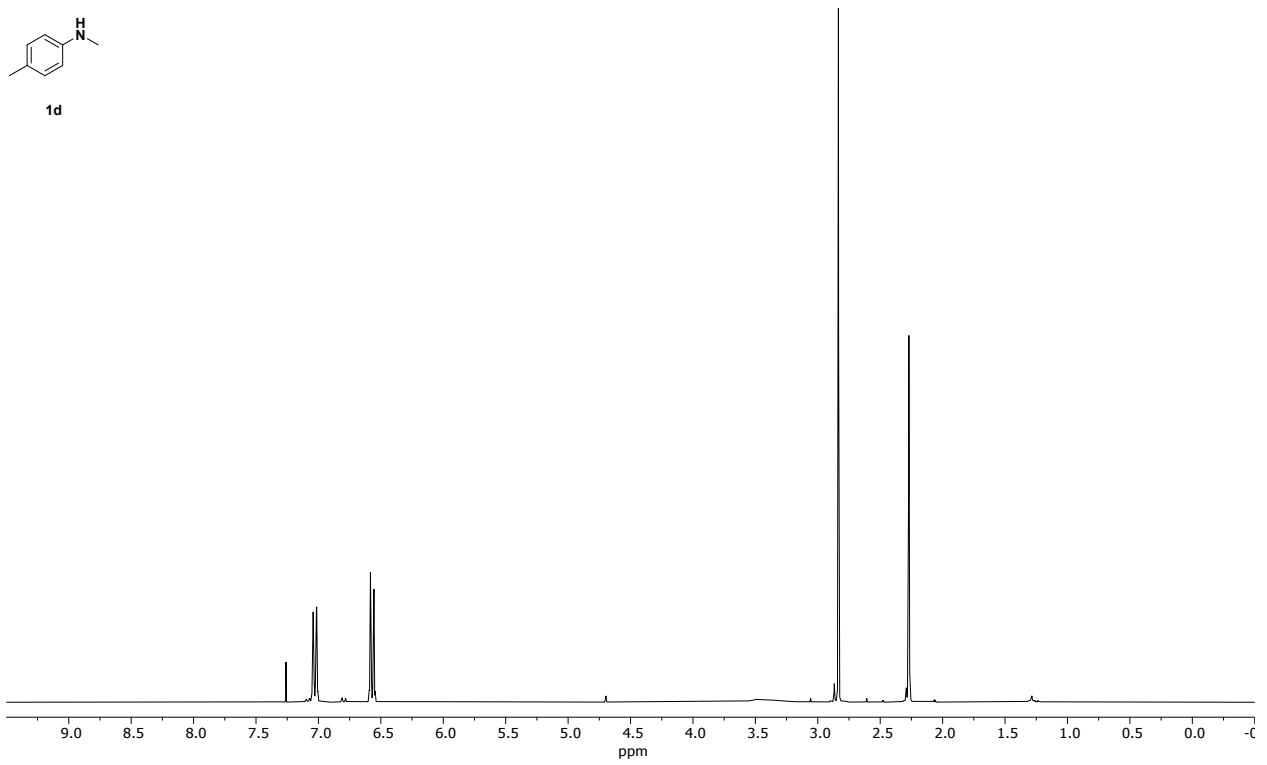

Piehl PP 994  
C13CPD CDCl3 {C:\Bruker\TopSpin3.6.0} 2001 39  
200129.f339.11.fid  
13C CDCl3

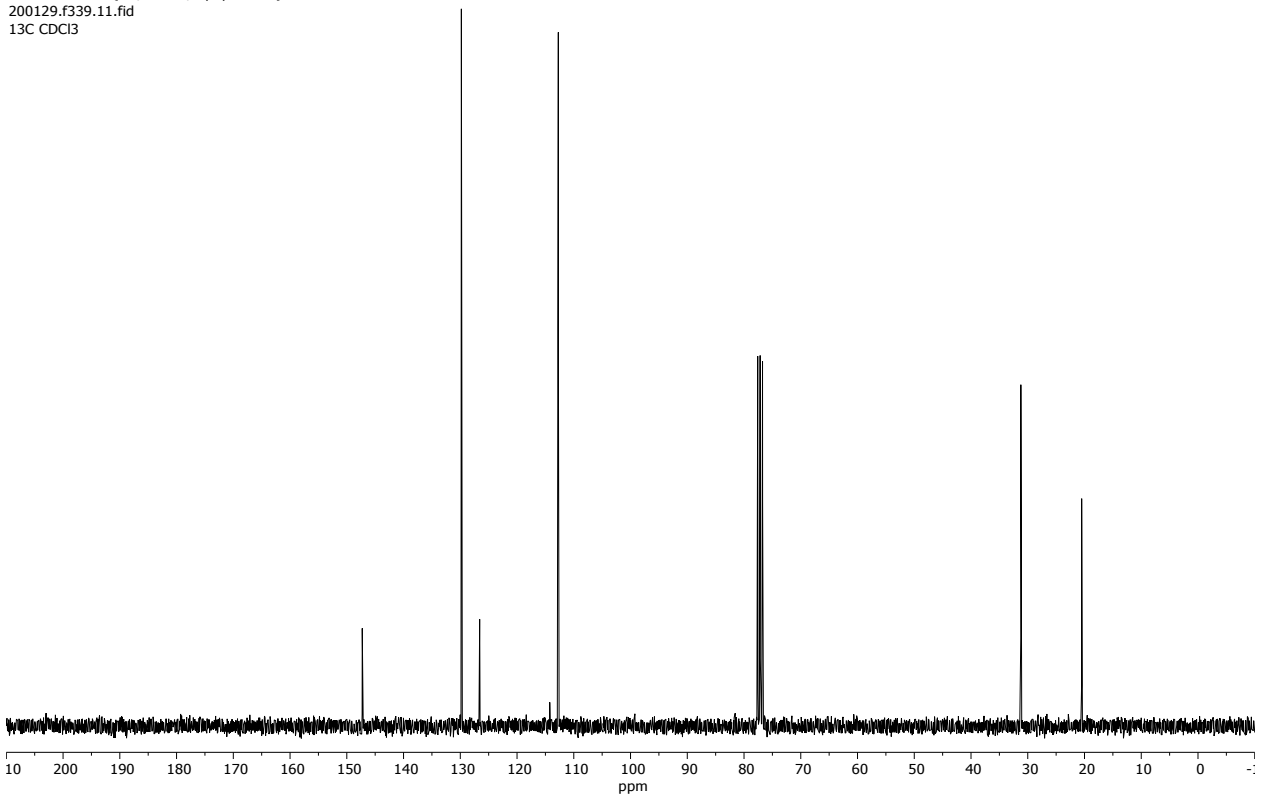

Piehl PP 1045C  
PROTON DMSO {C:\Bruker\TopSpin3.6.0} 2003 45  
200318.f345.10.fid  
1H DMSO

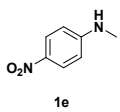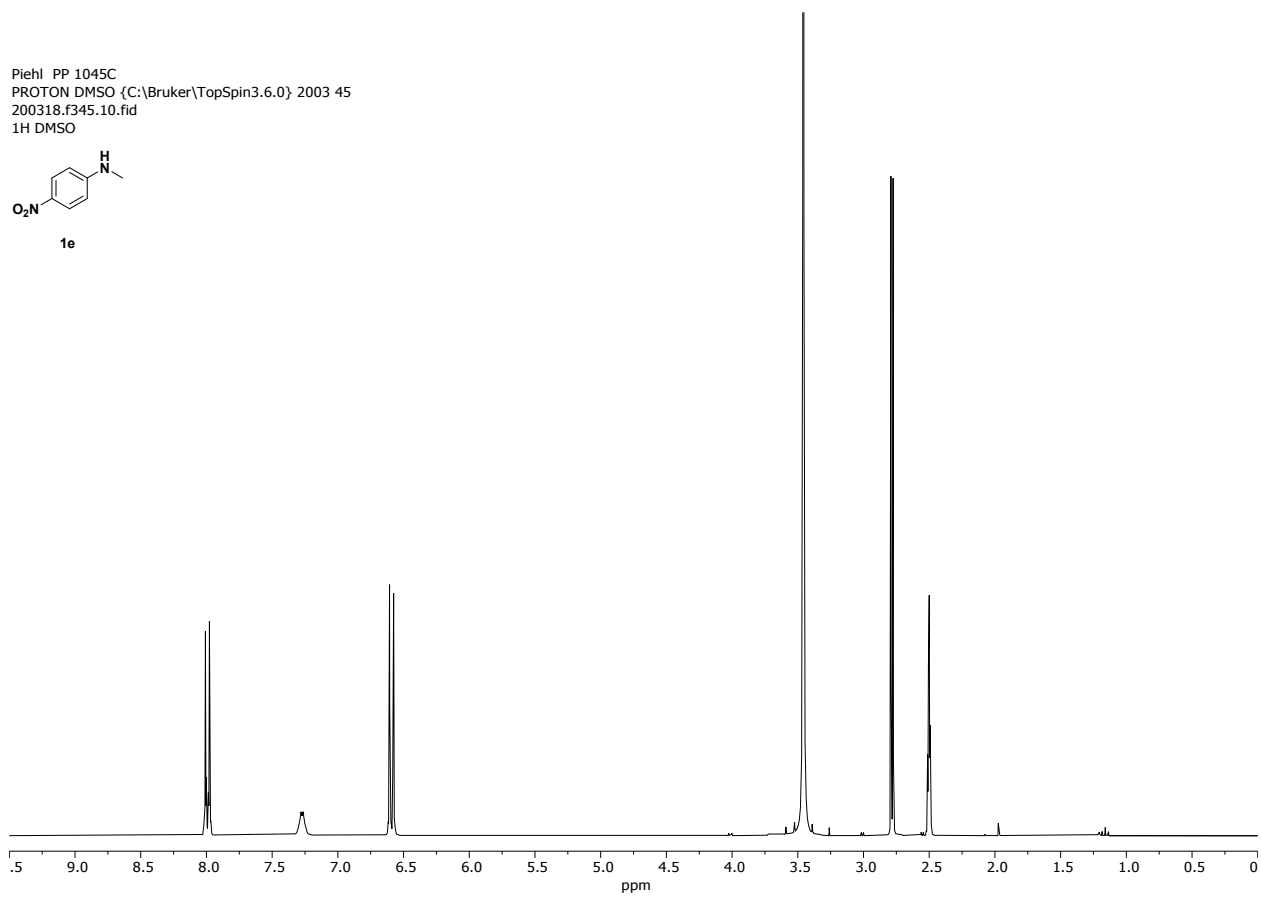

Piehl PP 1045C  
C13CPD DMSO {C:\Bruker\TopSpin3.6.0} 2003 45  
200318.f345.11.fid  
13C DMSO

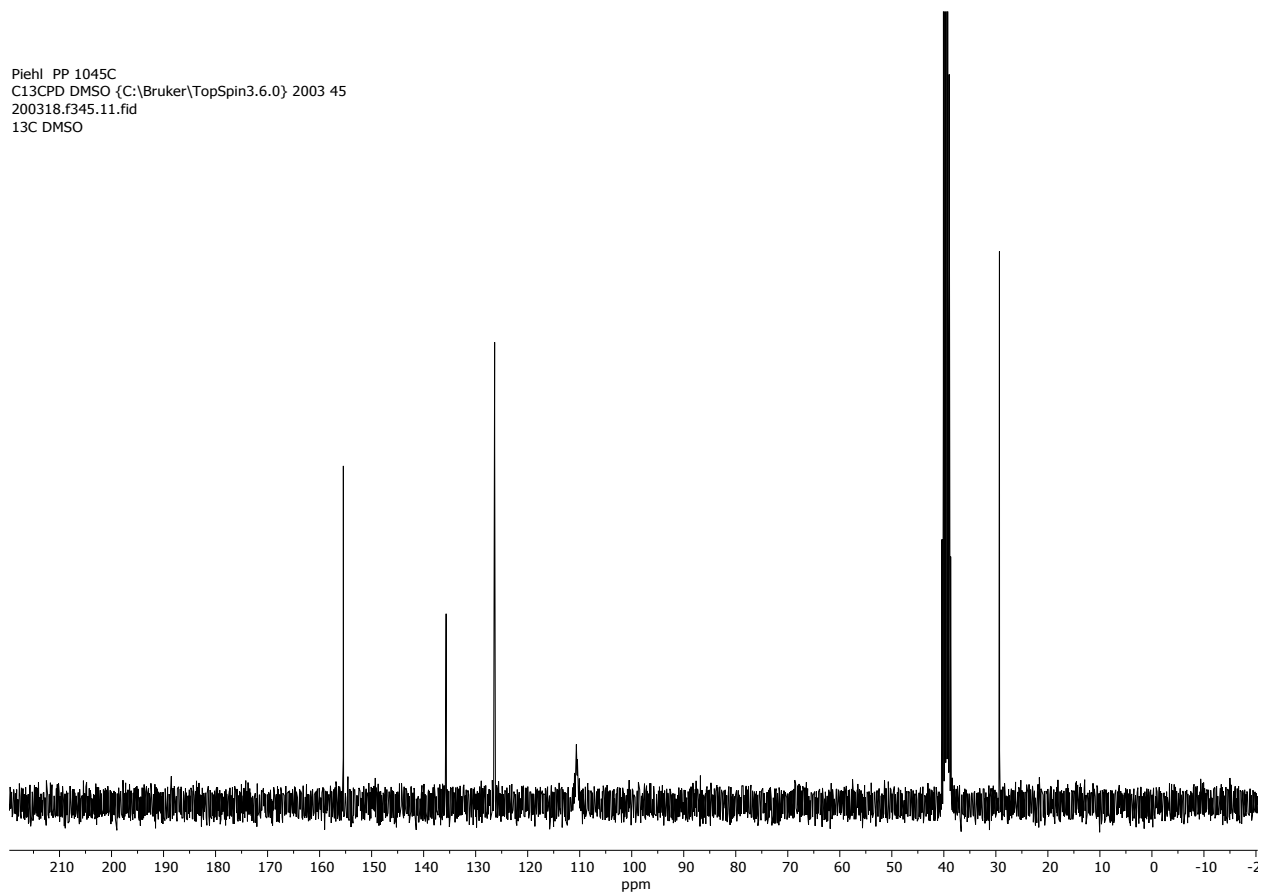

Piehl PP 1068  
Au1H CDCl3 {C:\Bruker\TopSpin3.5pl6} 2004 11  
200406.411.10.fid  
1H CDCl3

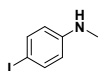

1f

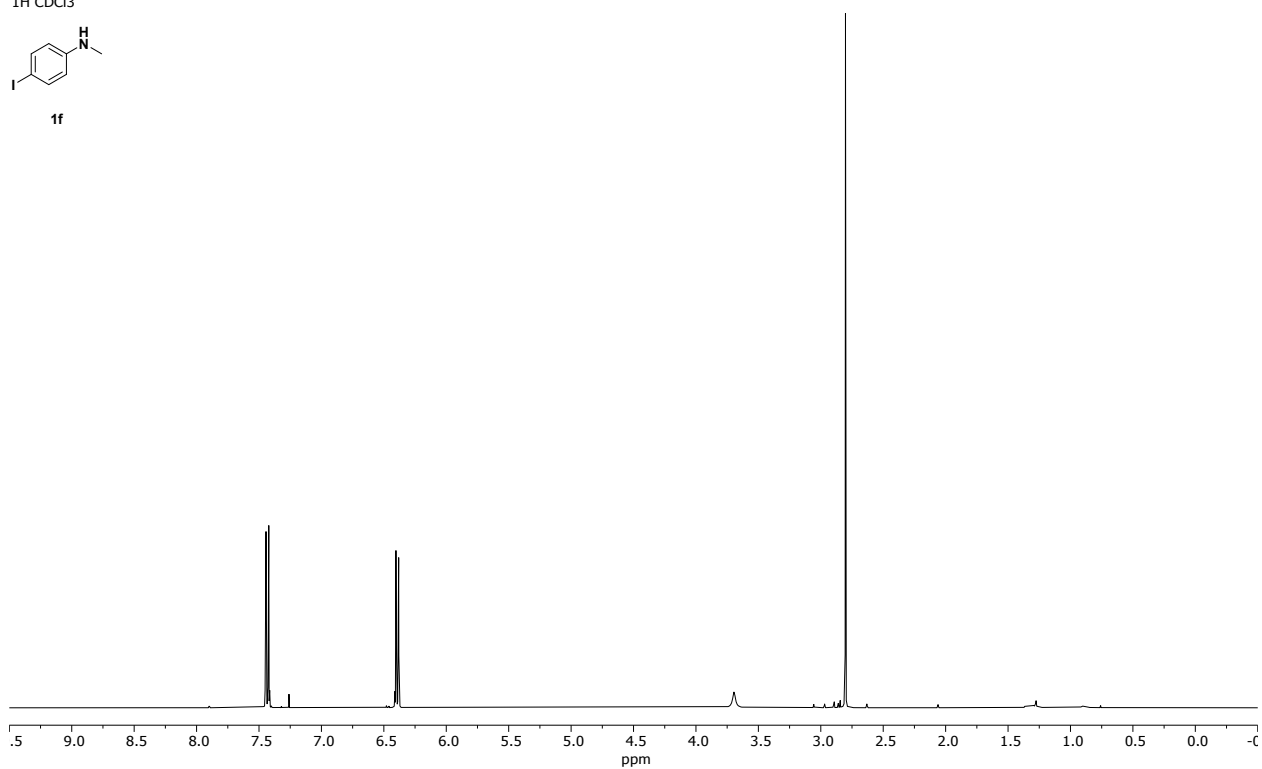

Piehl PP 1068  
Au13C CDCl3 {C:\Bruker\TopSpin3.5pl6} 2004 11  
200406.411.11.fid  
13C CDCl3

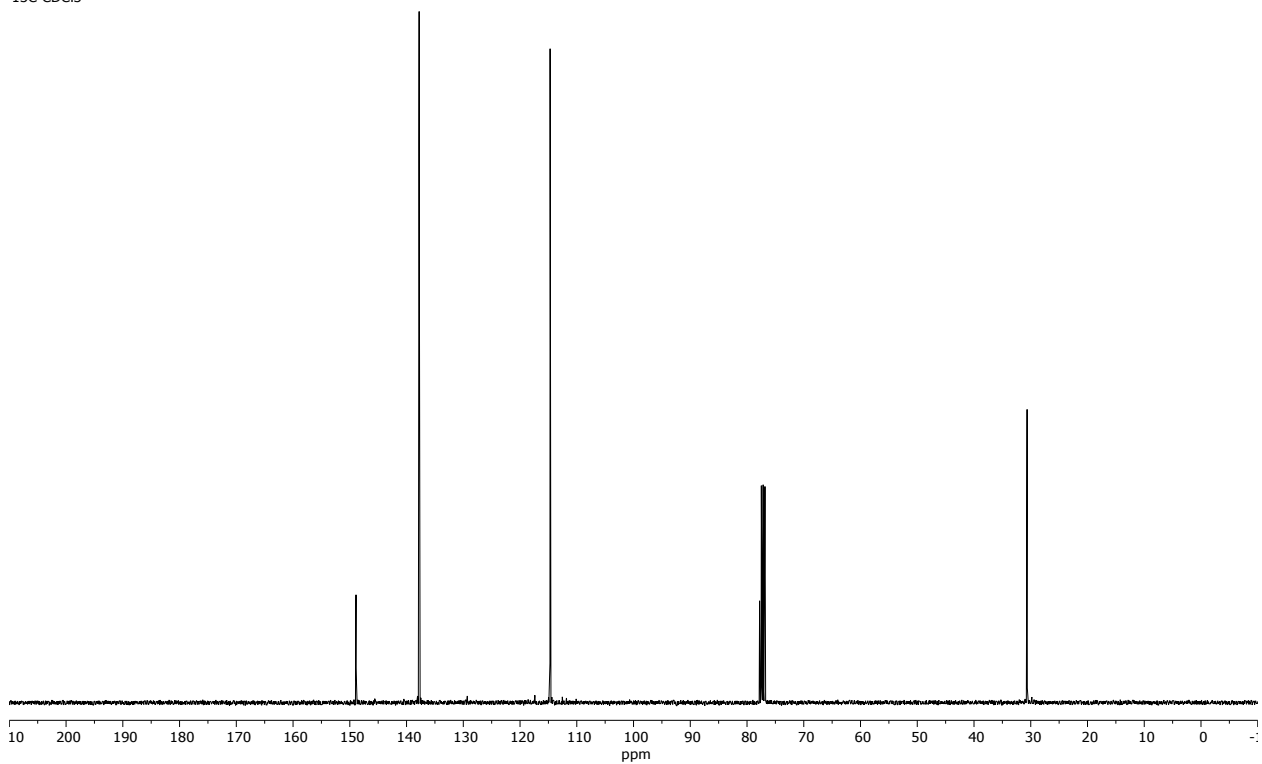

Piehl PP 995 B  
Au1H CDCl3 {C:\Bruker\TopSpin3.5pl6} 2002 4  
200204.404.10.fid  
1H CDCl3

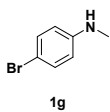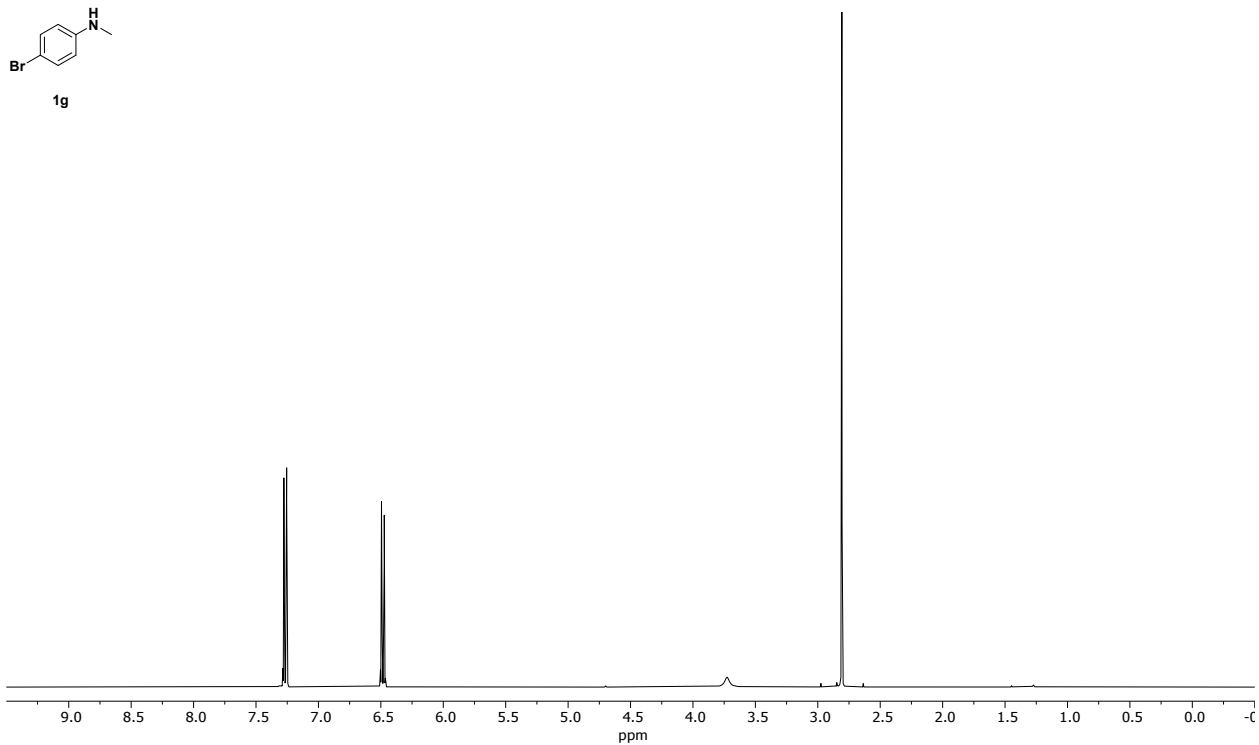

Piehl PP 995 B  
Au13C CDCl3 {C:\Bruker\TopSpin3.5pl6} 2002 4  
200204.404.11.fid  
13C CDCl3

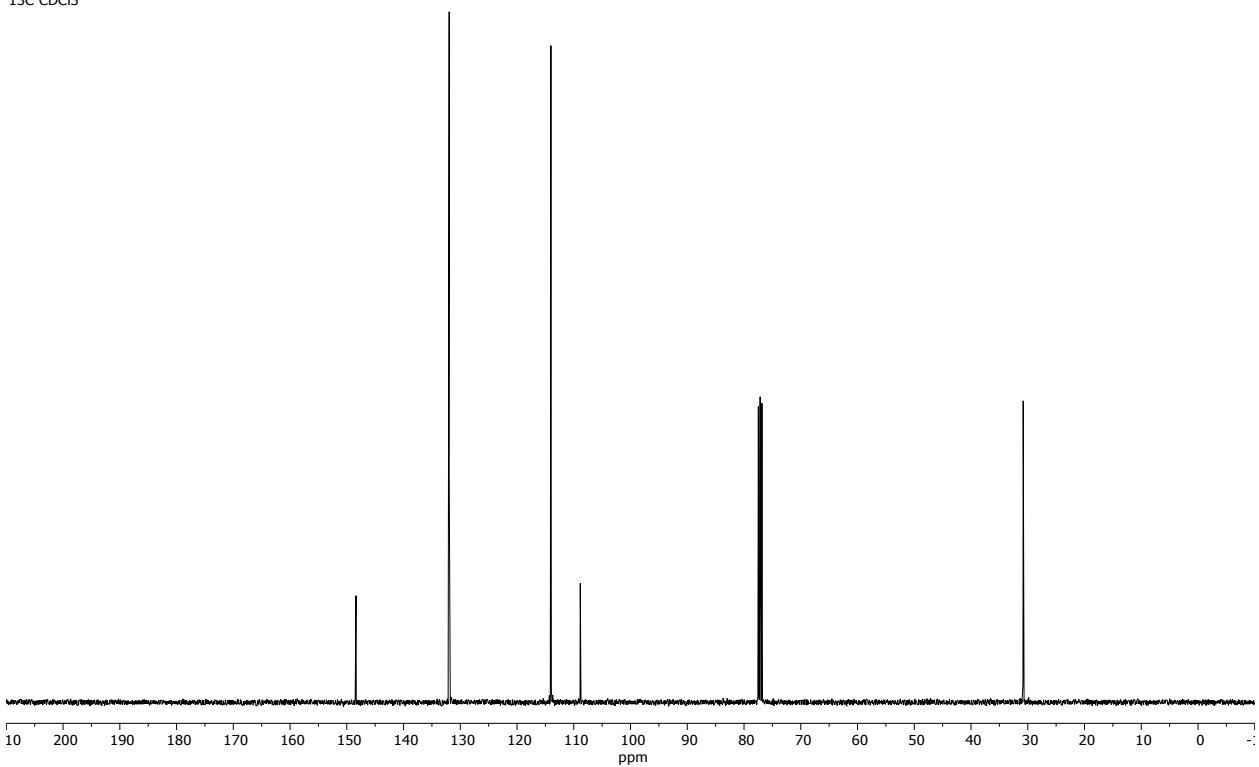

Piehl PP 996  
Au1H CDCl3 {C:\Bruker\TopSpin3.5pl6} 2002 3  
200204.403.10.fid  
1H CDCl3

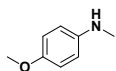

1h

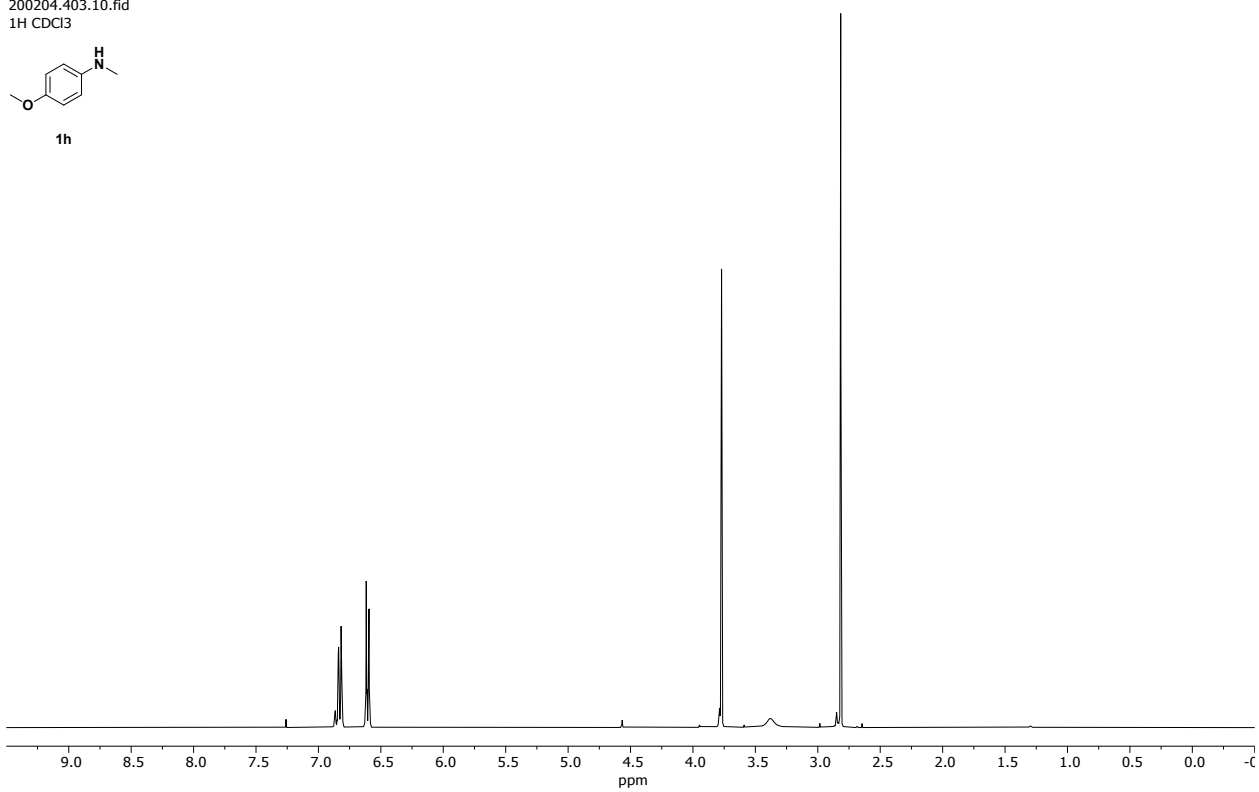

Piehl PP 996  
Au13C CDCl3 {C:\Bruker\TopSpin3.5pl6} 2002 3  
200204.403.11.fid  
13C CDCl3

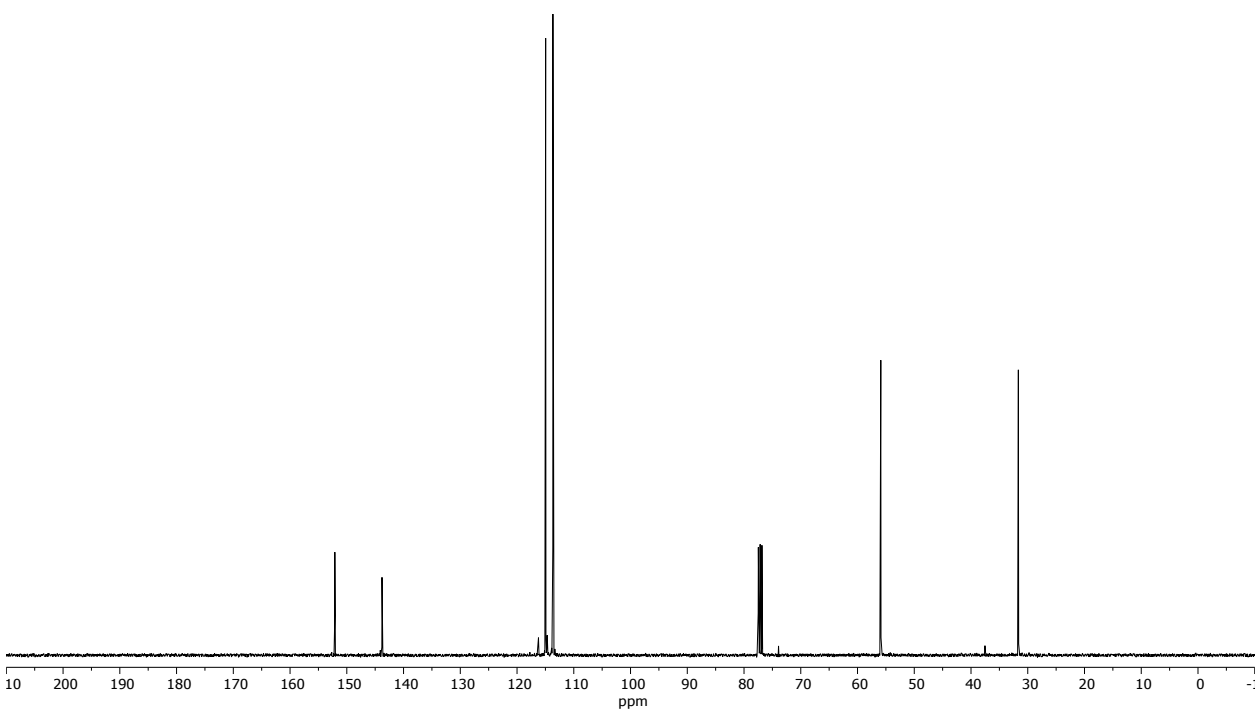

Piehl PP 1051  
Au1H CDCl3 {C:\Bruker\TopSpin3.5pl6} 2003 16  
200319.416.10.fid  
1H CDCl3

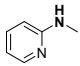

1i

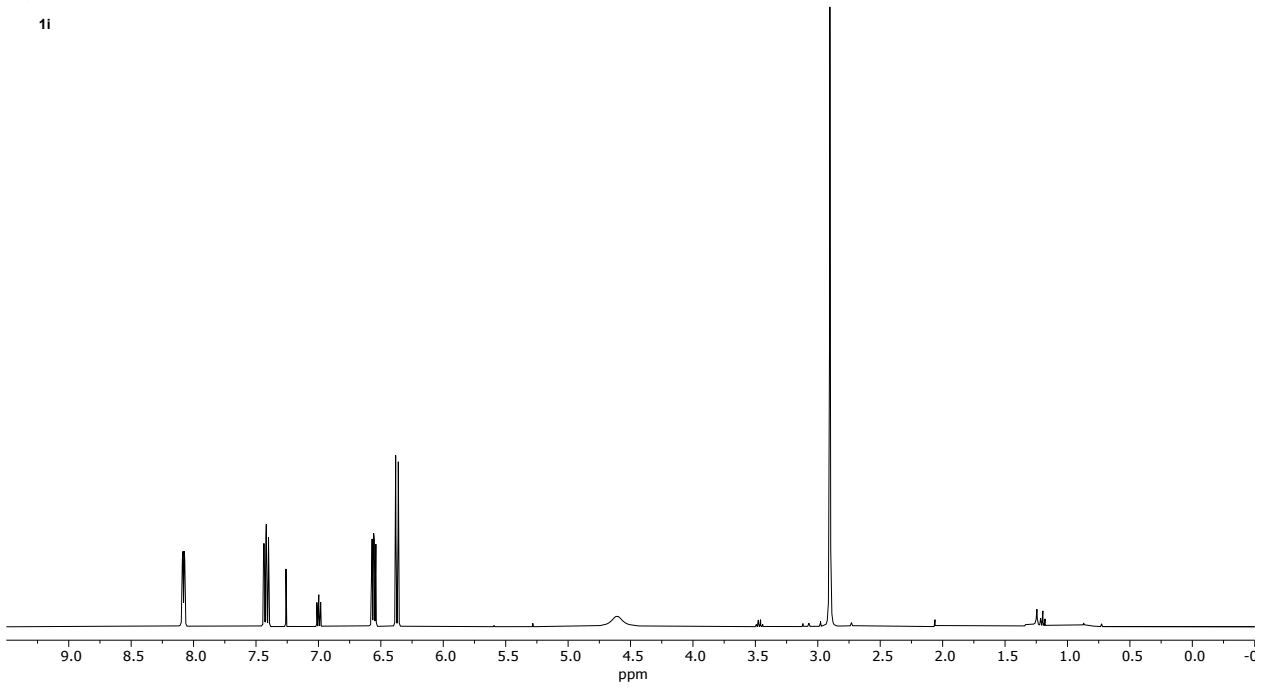

Piehl PP 1051  
Au13C CDCl3 {C:\Bruker\TopSpin3.5pl6} 2003 16  
200319.416.11.fid  
13C CDCl3

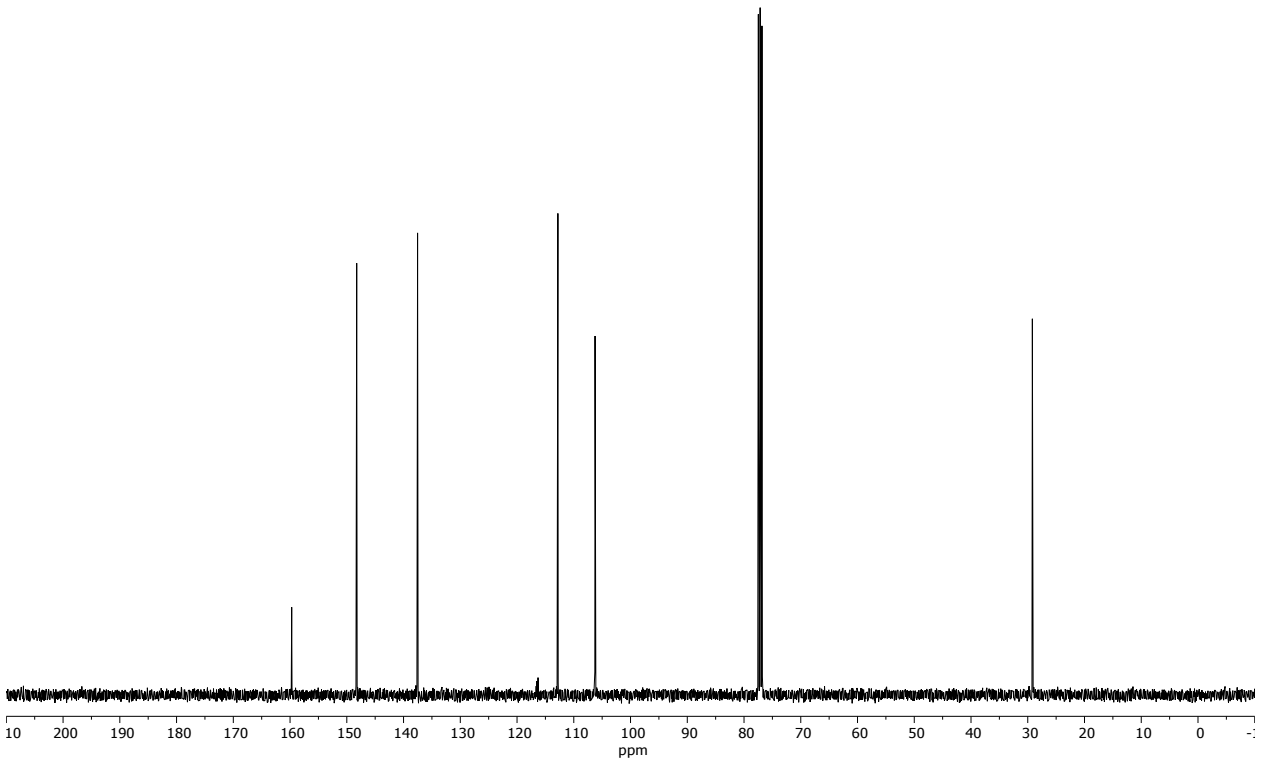

Piehl PP 1035  
Au1H CDCl3 {C:\Bruker\TopSpin3.5pl6} 2003 7  
200306.407.10.fid  
1H CDCl3

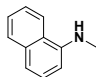

1k

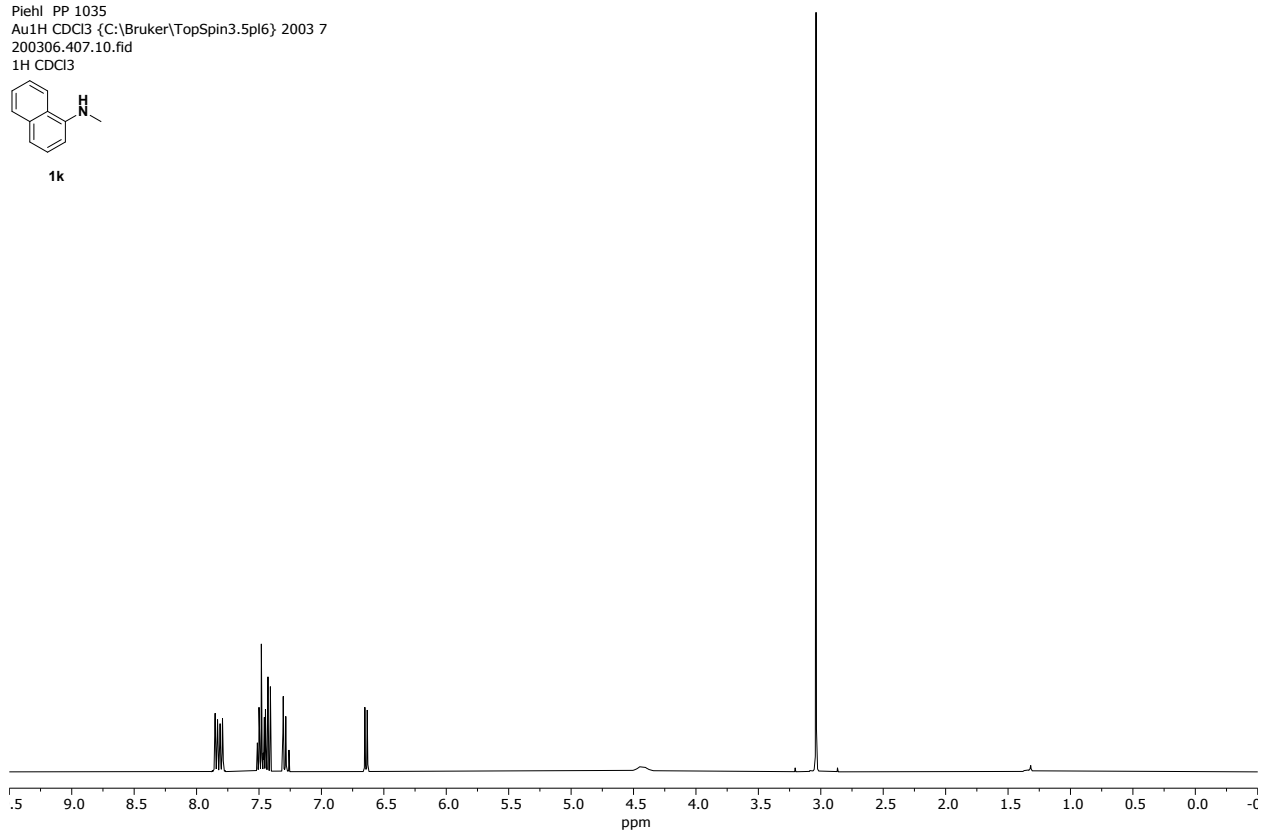

Piehl PP 1035  
Au13C CDCl3 {C:\Bruker\TopSpin3.5pl6} 2003 7  
200306.407.11.fid  
13C CDCl3

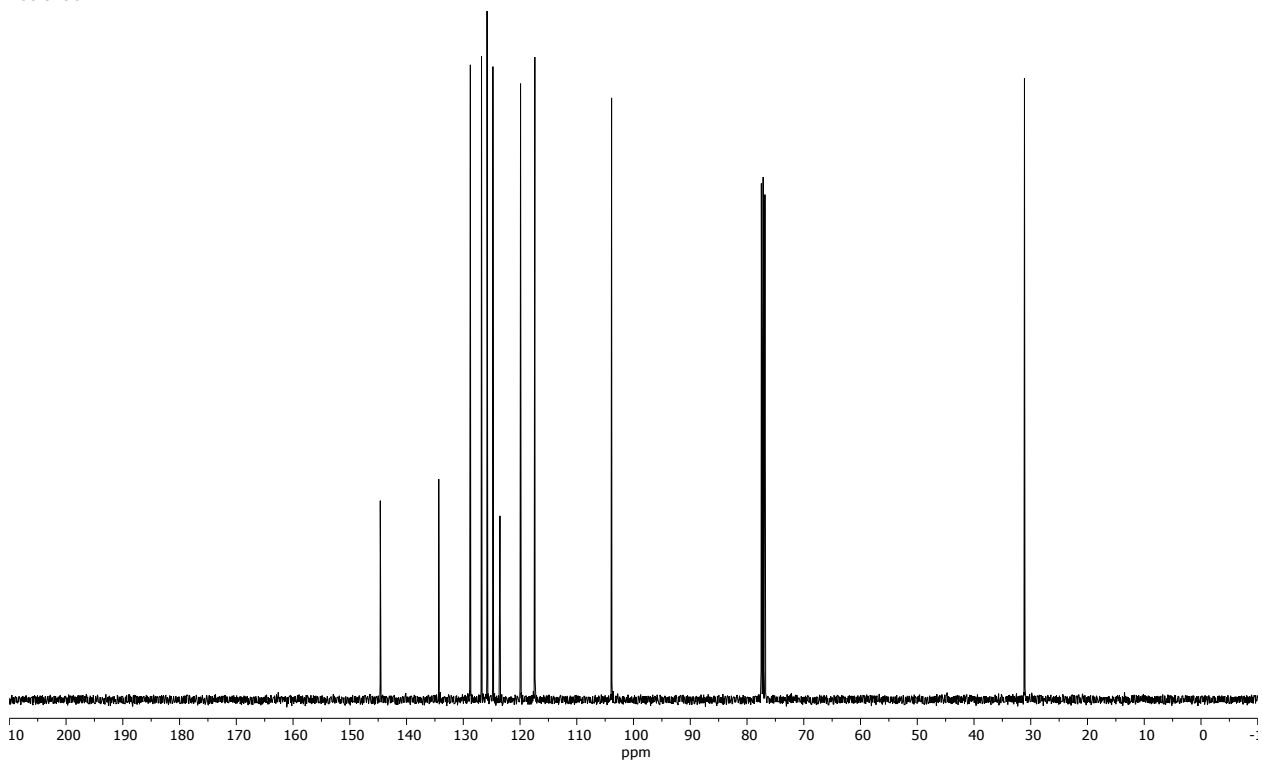



Piehl / PP1057  
PROTON DMSO {C:\Bruker\TopSpin3.6.0} 2003 53  
200325.f353.10.fid  
1H DMSO

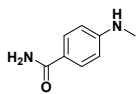

11

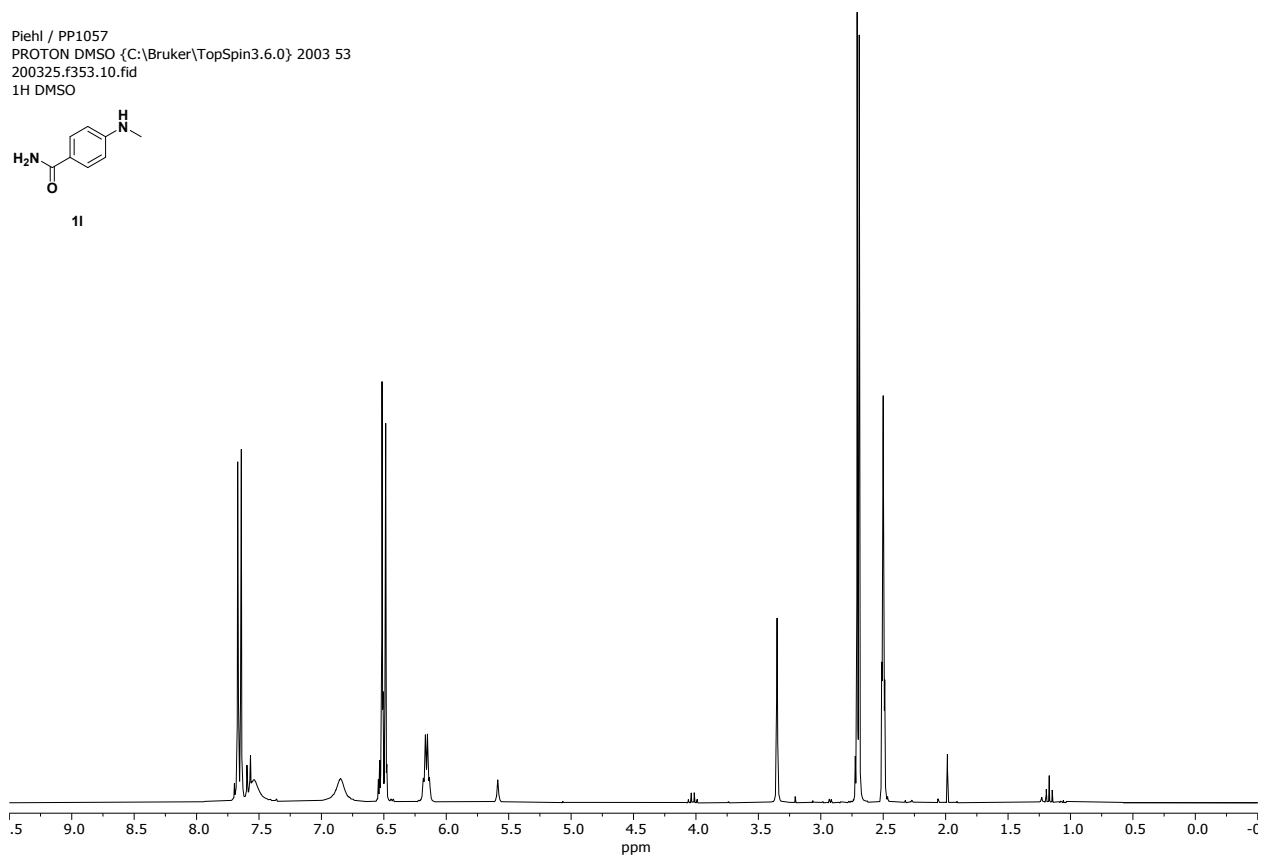

Piehl / PP1057  
C13CPD DMSO {C:\Bruker\TopSpin3.6.0} 2003 53  
200325.f353.11.fid  
13C DMSO

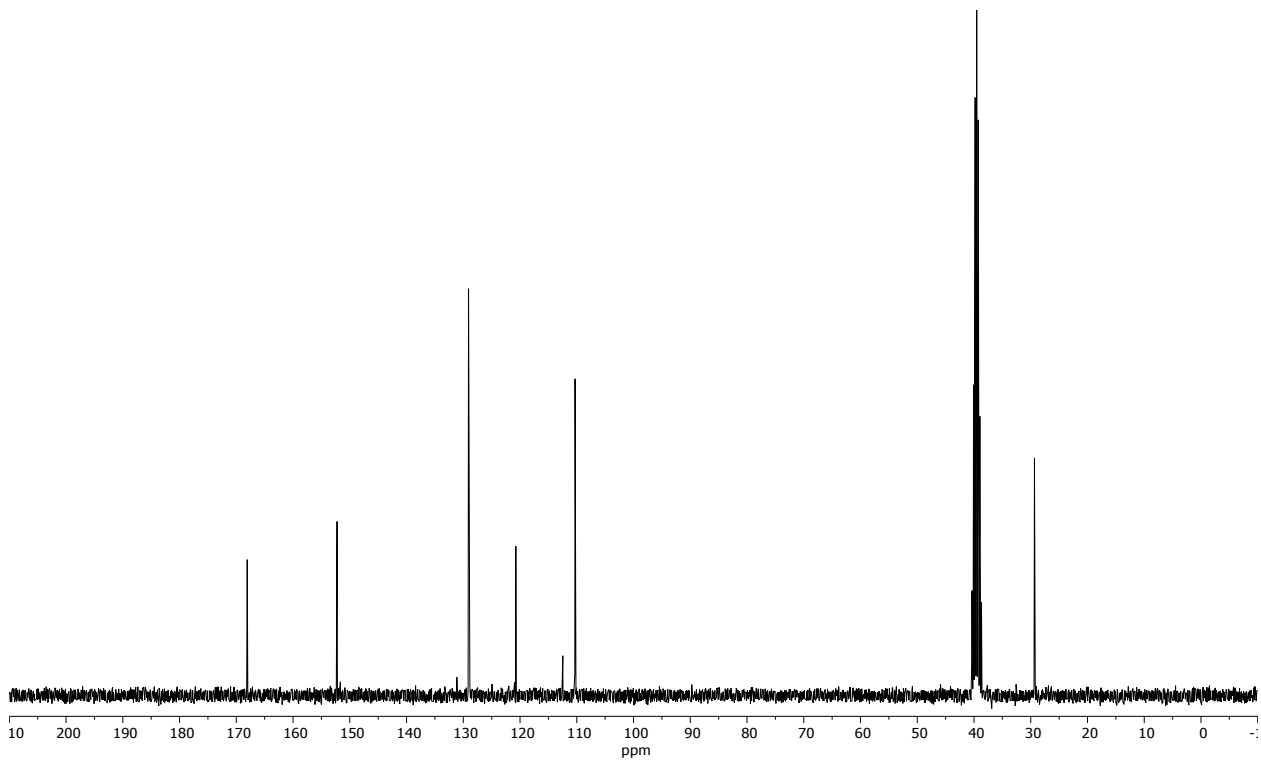

Piehl PP 1037  
Au1H CDCl3 {C:\Bruker\TopSpin3.5pl6} 2003 23  
200310.423.10.fid  
1H CDCl3

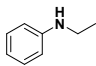

3a

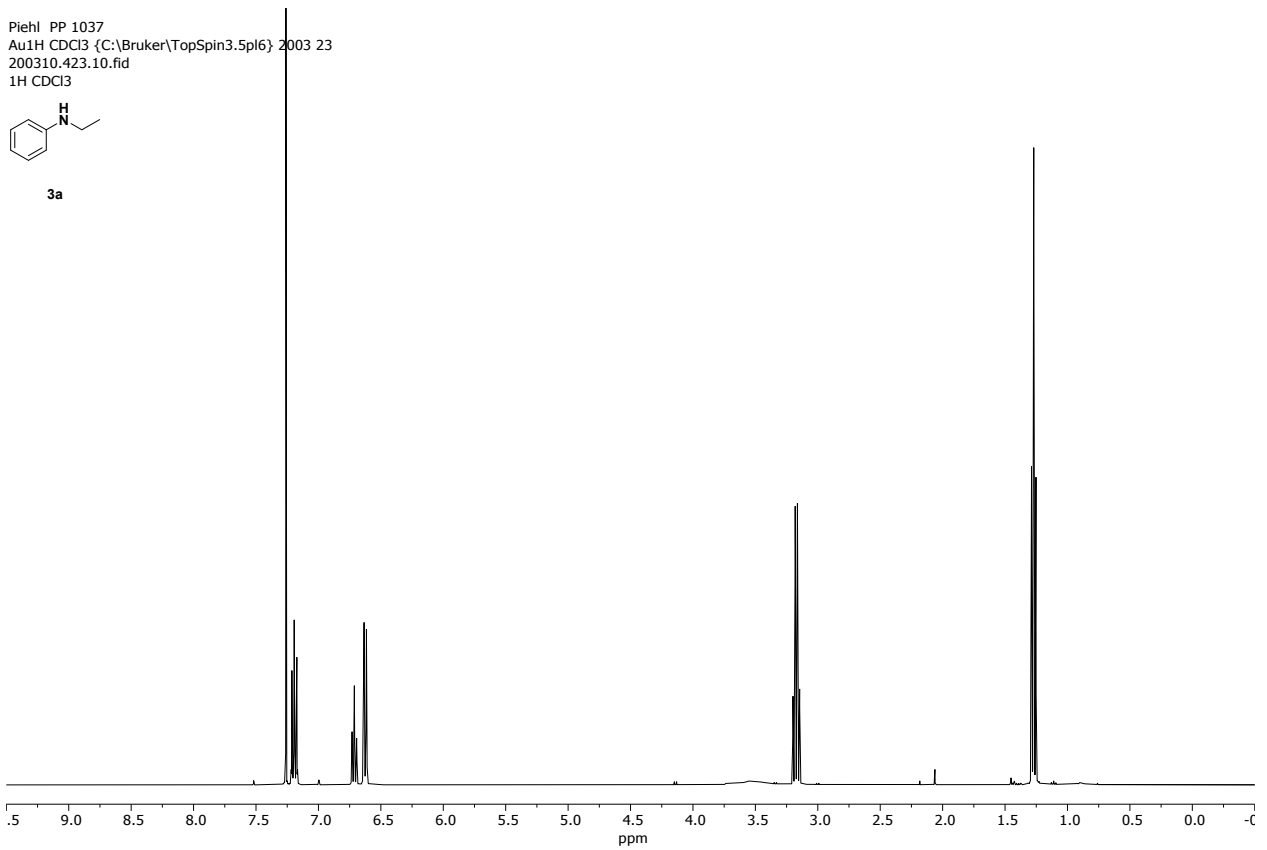

Piehl PP 1037  
Au13C CDCl3 {C:\Bruker\TopSpin3.5pl6} 2003 23  
200310.423.11.fid  
13C CDCl3

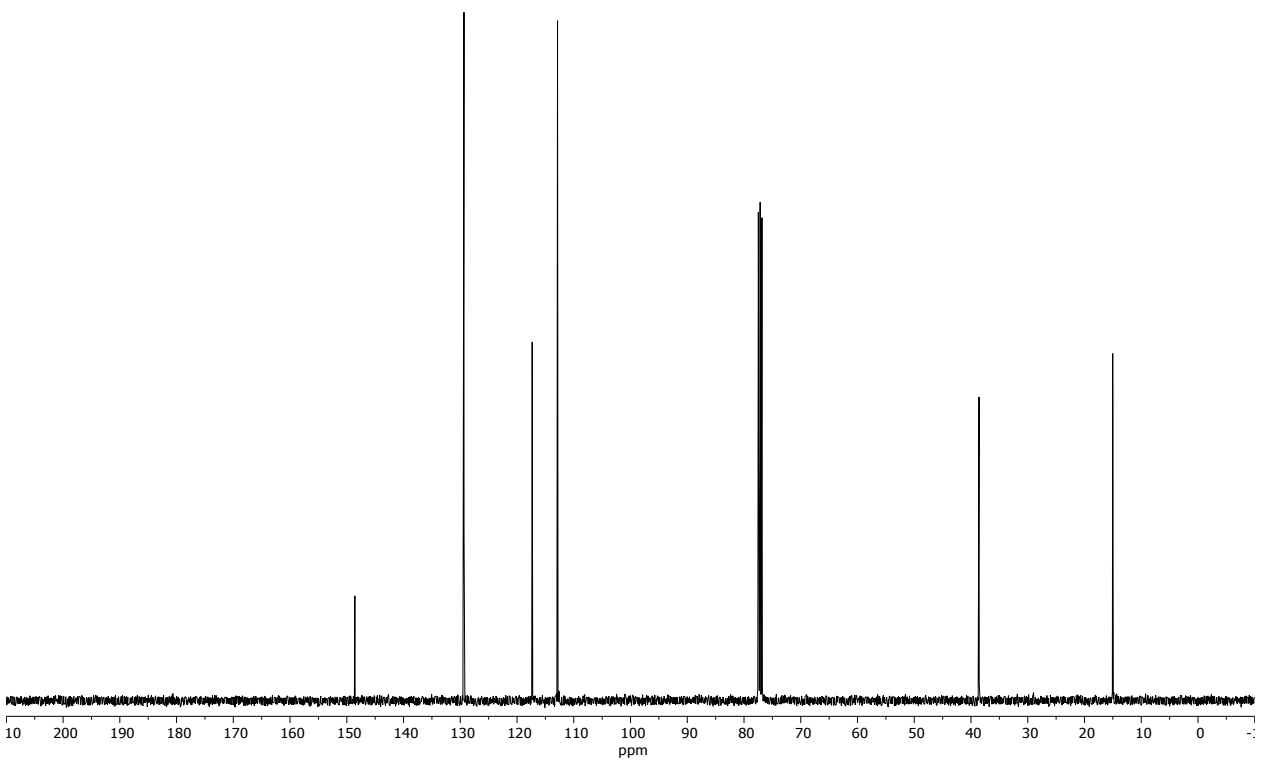

Piehl PP 1013  
PROTON CDCl3 {C:\Bruker\TopSpin3.6.0} 2002 37  
200218.f337.10.fid  
1H CDCl3

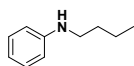

3b

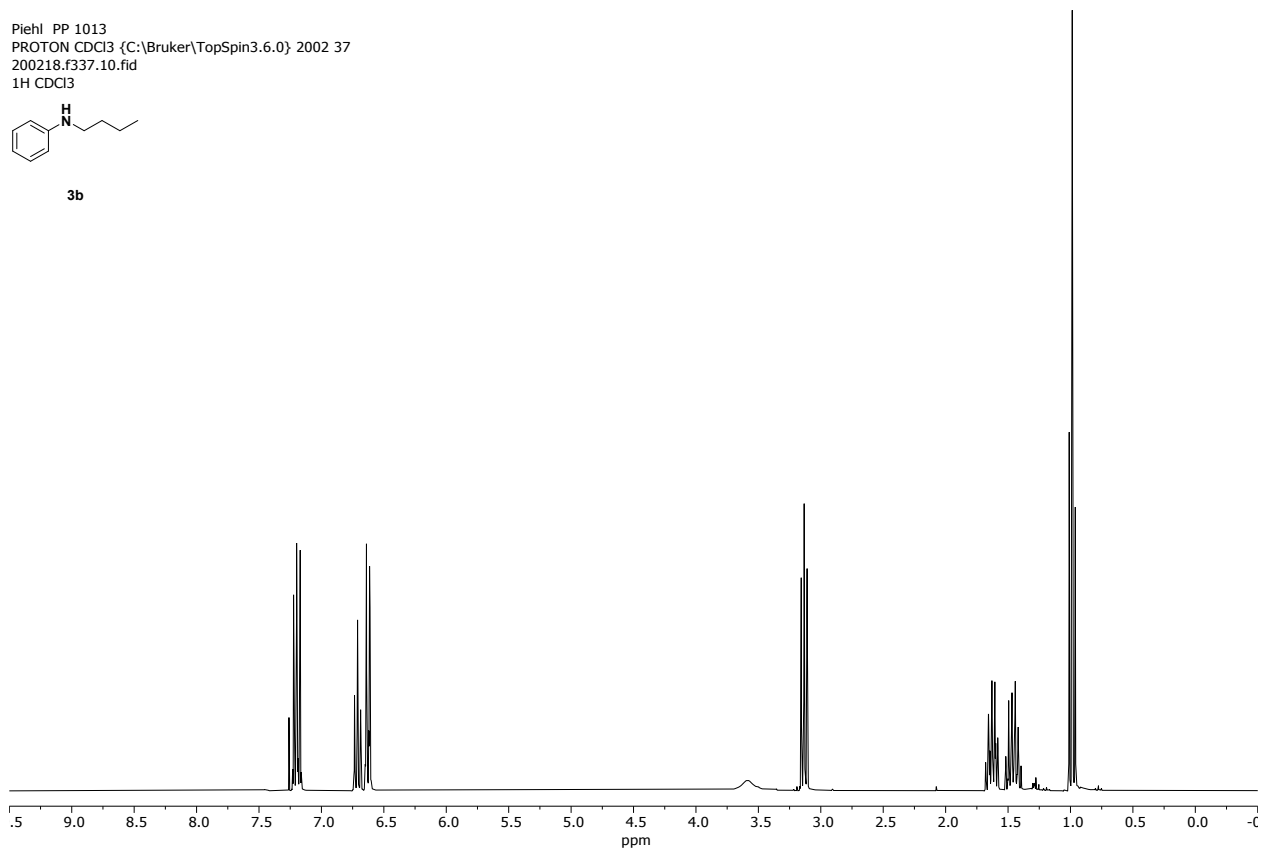

Piehl PP 1013  
C13CPD CDCl3 {C:\Bruker\TopSpin3.6.0} 2002 37  
200218.f337.11.fid  
13C CDCl3

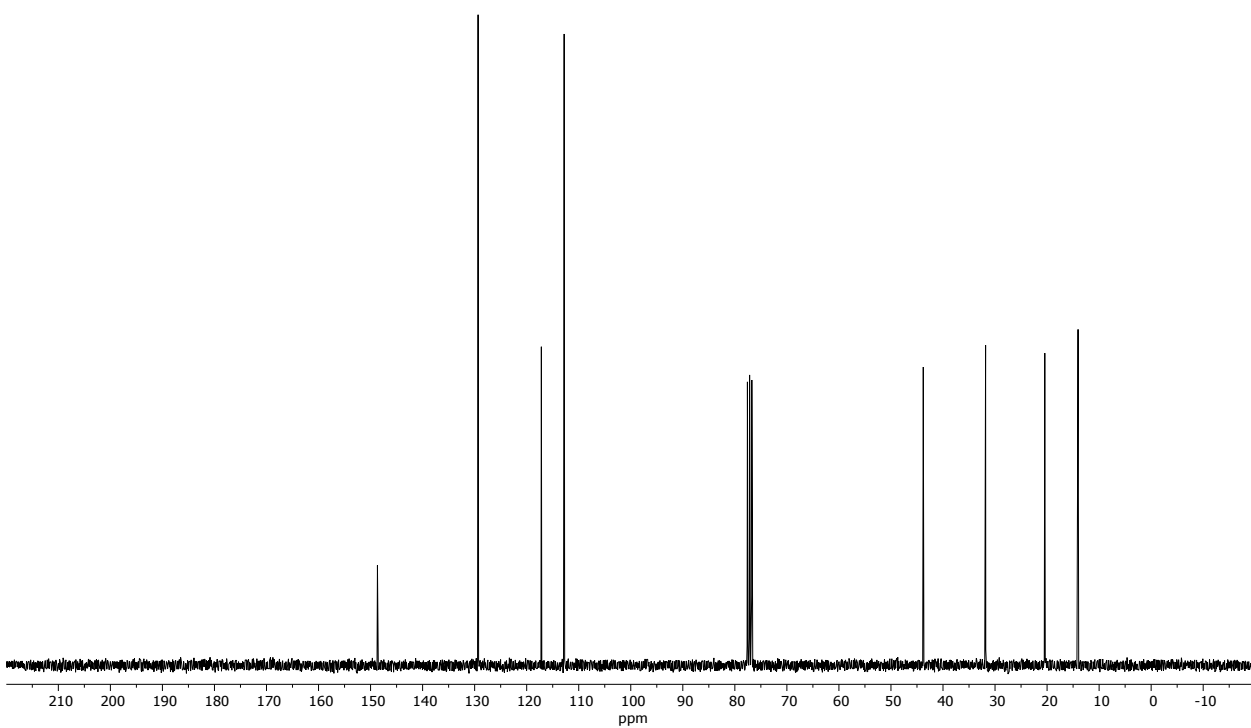

Piehl PP 1066  
Au1H CDCl3 {C:\Bruker\TopSpin3.5pl6} 2004 12  
200406.412.10.fid  
1H CDCl3

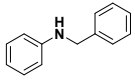

3c

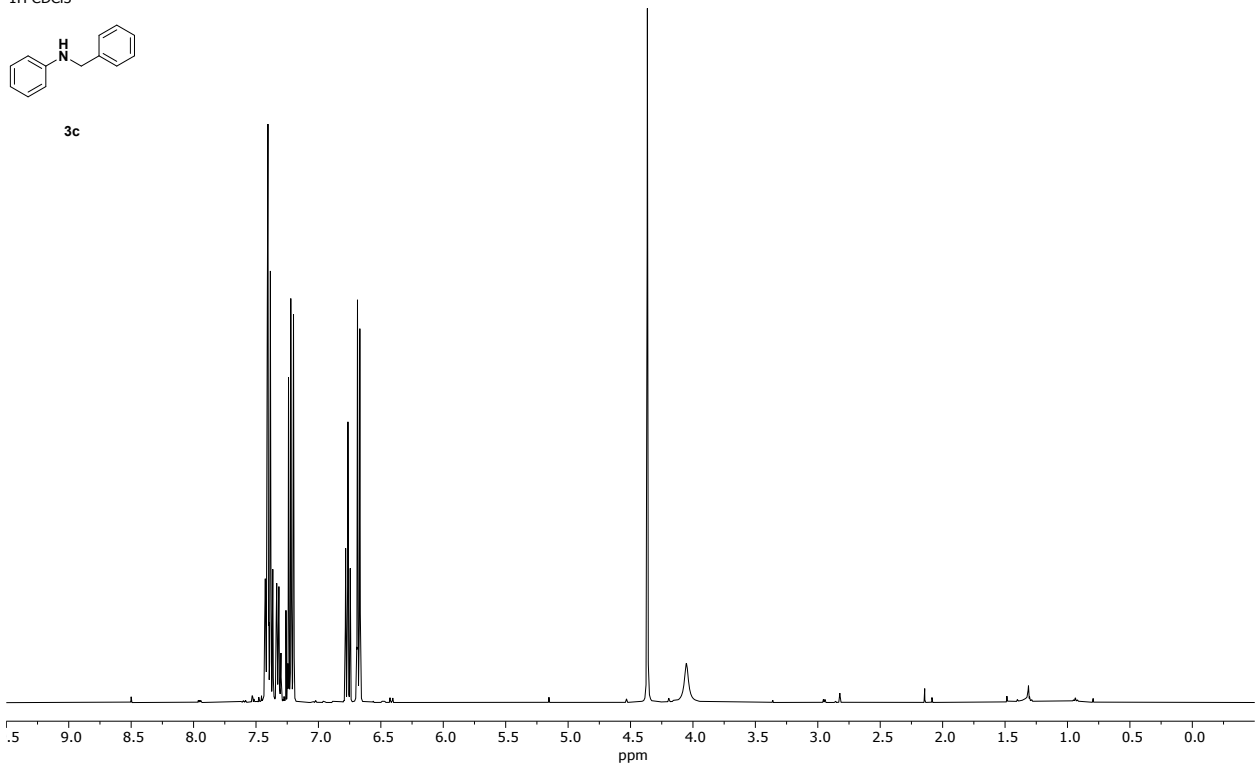

Piehl PP 1066  
Au13C CDCl3 {C:\Bruker\TopSpin3.5pl6} 2004 12  
200406.412.11.fid  
13C CDCl3

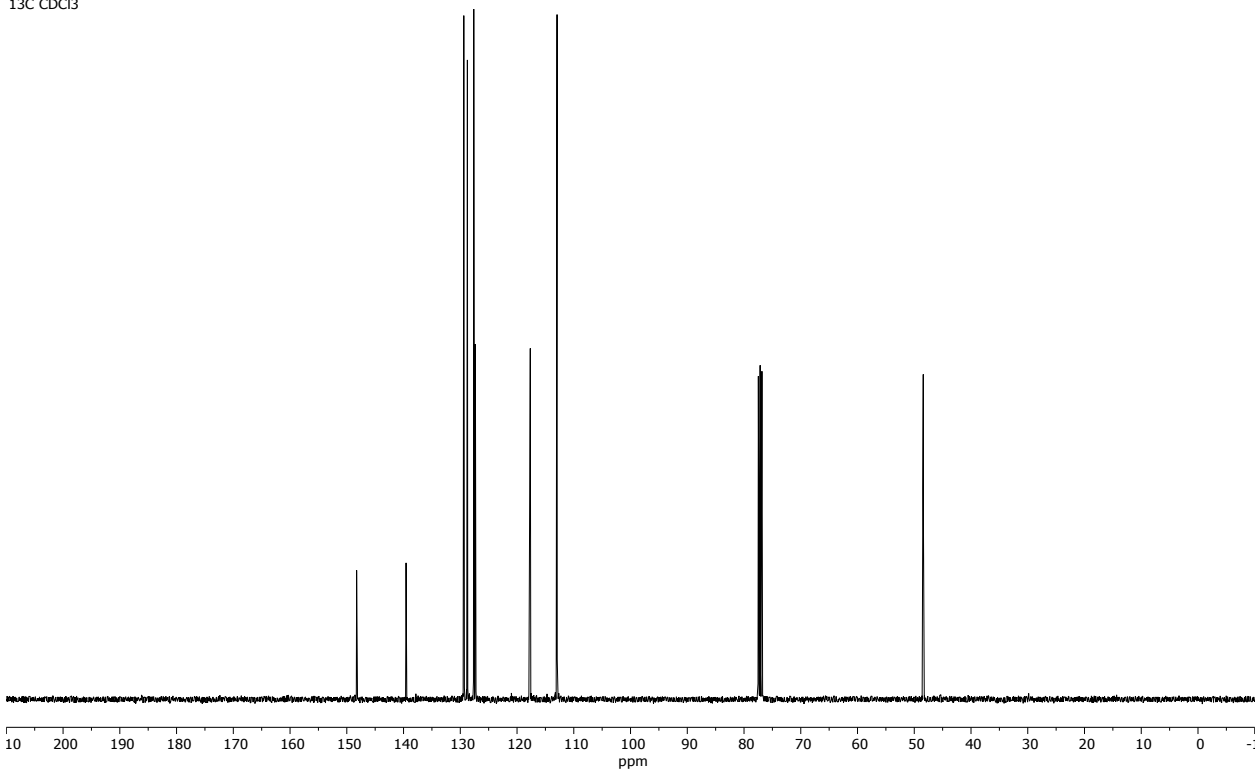

Piehl PP 1040  
Au1H CDCl3 {C:\Bruker\TopSpin3.5pl6} 2003 24  
200310.424.10.fid  
1H CDCl3

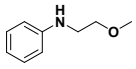

3d

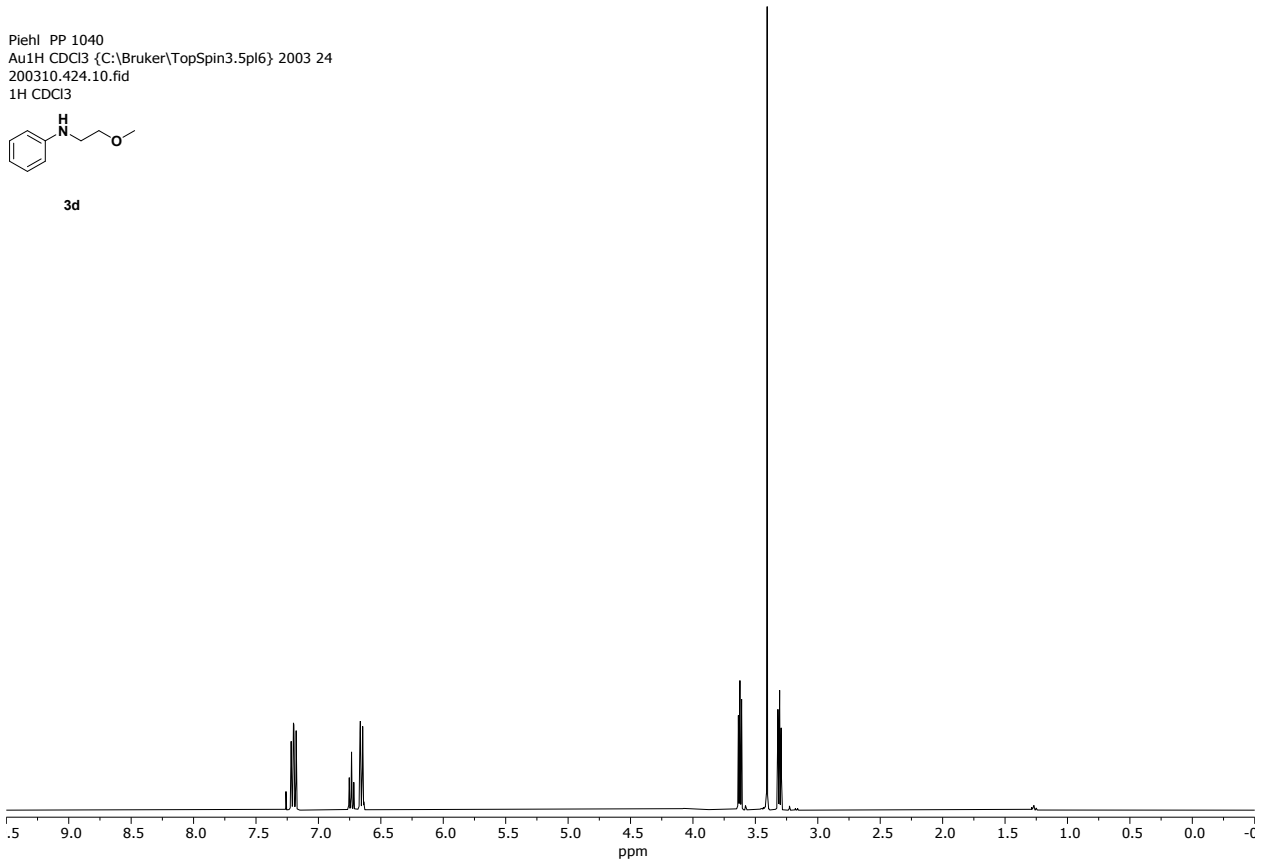

Piehl PP 1040  
Au13C CDCl3 {C:\Bruker\TopSpin3.5pl6} 2003 24  
200310.424.11.fid  
13C CDCl3

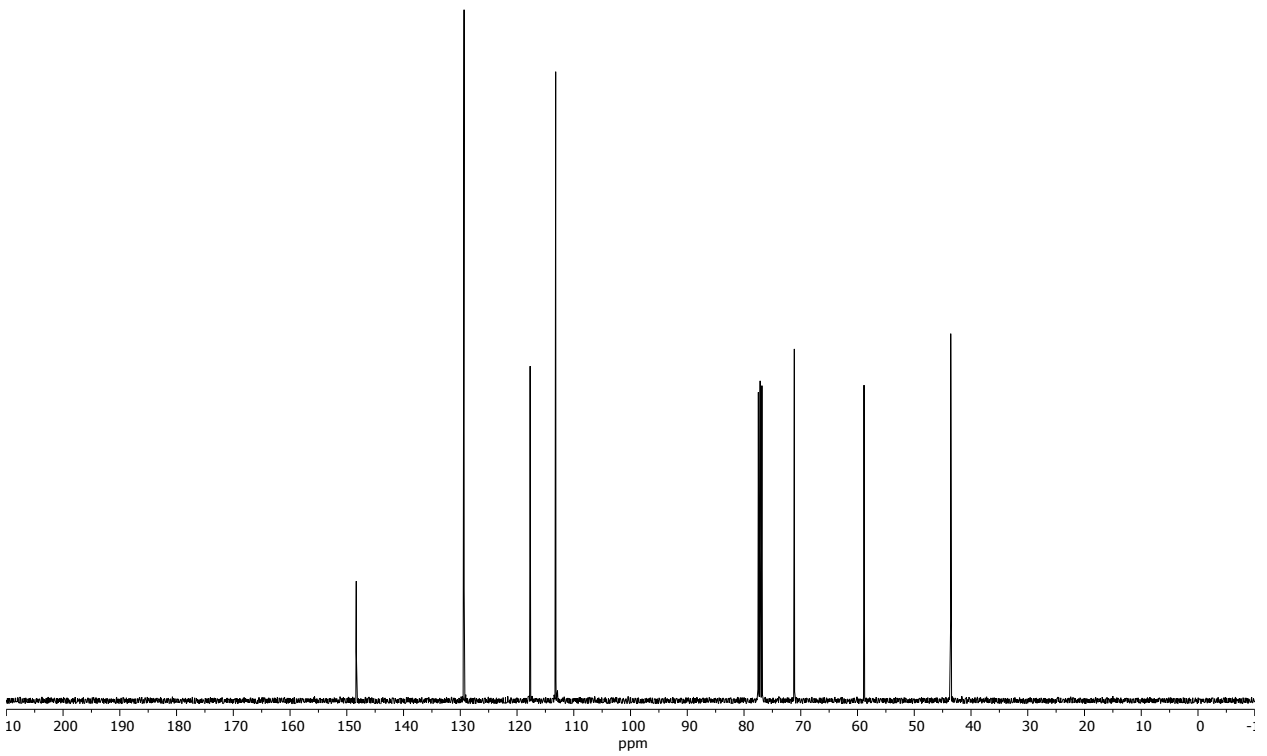

Supplement: d0cy02210a1.pdf [file d0cy02210a1.pdf]
